# Supplementary material
Source: Elsevier journal article supplement (https://www.sciencedirect.com/science/article/pii/S2589004220310348)
Supplement: mmc1 [file 1-s2.0-S2589004220310348-mmc1.pdf]

**iScience, Volume 23**

**Supplemental Information**

**Investigating Diadromy in Fishes  
and Its Loss in an -Omics Era**

**M. Lisette Delgado and Daniel E. Ruzzante**

**Table S1.** List of known diadromous species. Related to Table 1.

| Species                          | Family         | Category        | Little information available (e.g. no microchemistry analysis) | References                                            | Resident populations |
|----------------------------------|----------------|-----------------|----------------------------------------------------------------|-------------------------------------------------------|----------------------|
| <i>Acipenser baerii</i>          | Acipenseridae  | anadromous      |                                                                | (Rodríguez et al., 2002)                              | yes                  |
| <i>Acipenser brevirostrum</i>    | Acipenseridae  | anadromous      |                                                                | (Kynard, 1997)                                        |                      |
| <i>Acipenser dabryanus</i>       | Acipenseridae  | anadromous      |                                                                | (Kynard et al., 2003)                                 |                      |
| <i>Acipenser gueldenstaedtii</i> | Acipenseridae  | semi-anadromous |                                                                | (Arai and Miyazaki, 2001)                             | yes                  |
| <i>Acipenser medirostris</i>     | Acipenseridae  | anadromous      |                                                                | (Allen et al., 2009)                                  |                      |
| <i>Acipenser mikadoi</i>         | Acipenseridae  | anadromous      |                                                                | (Koshelev et al., 2012)                               |                      |
| <i>Acipenser naccarii</i>        | Acipenseridae  | semi-anadromous |                                                                | (Martínez-Álvarez et al., 2005)                       |                      |
| <i>Acipenser nudiventris</i>     | Acipenseridae  | anadromous      |                                                                | (Acolas and Lambert, 2016)                            |                      |
| <i>Acipenser oxyrinchus</i>      | Acipenseridae  | anadromous      |                                                                | (Allen et al., 2014)                                  |                      |
| <i>Acipenser persicus</i>        | Acipenseridae  | anadromous      |                                                                | (Acolas and Lambert, 2016)                            |                      |
| <i>Acipenser schrenckii</i>      | Acipenseridae  | anadromous      |                                                                | (Koshelev et al., 2014)                               |                      |
| <i>Acipenser sinensis</i>        | Acipenseridae  | anadromous      |                                                                | (Zhuang et al., 2002)                                 |                      |
| <i>Acipenser stellatus</i>       | Acipenseridae  | anadromous      |                                                                | (Honț et al., 2019)                                   |                      |
| <i>Acipenser sturio</i>          | Acipenseridae  | anadromous      |                                                                | (Acolas et al., 2012)                                 |                      |
| <i>Acipenser transmontanus</i>   | Acipenseridae  | anadromous      |                                                                | (McEnroe and Cech, 1985)                              |                      |
| <i>Huso dauricus</i>             | Acipenseridae  | anadromous      |                                                                | (Koshelev et al., 2014)                               |                      |
| <i>Huso huso</i>                 | Acipenseridae  | anadromous      |                                                                | (Honț et al., 2019)                                   |                      |
| <i>Scaphirhynchus suttkusi</i>   | Acipenseridae  | anadromous      |                                                                | (Acolas and Lambert, 2016)                            |                      |
| <i>Arius madagascariensis</i>    | Ariidae        | anadromous      | X                                                              | (Acolas and Lambert, 2016; Milton, 2009)              |                      |
| <i>Genidens barbatus</i>         | Ariidae        | anadromous      |                                                                | (Avigliano et al., 2017)                              | yes                  |
| <i>Neoarius graeffei</i>         | Ariidae        | anadromous      | X                                                              | (Milton, 2009)                                        |                      |
| <i>Atherinella chagresi</i>      | Atherinopsidae | anadromous      | X                                                              | (Milton, 2009)                                        |                      |
| <i>Atherinella guatemalensis</i> | Atherinopsidae | anadromous      | X                                                              | (Milton, 2009)                                        |                      |
| <i>Mystus gulio</i>              | Bagridae       | anadromous      | X                                                              | (Acolas and Lambert, 2016; Bijoy Nandan et al., 2012) |                      |
| <i>Citharinus citharus</i>       | Citharinidae   | anadromous      | X                                                              | (Riede, 2004)                                         |                      |
| <i>Citharinus eburneensis</i>    | Citharinidae   | anadromous      | X                                                              | (Acolas and Lambert, 2016)                            |                      |
| <i>Clarotes laticeps</i>         | Claroteidae    | anadromous      | X                                                              | (Acolas and Lambert, 2016)                            |                      |
| <i>Alosa aestivalis</i>          | Clupeidae      | anadromous      |                                                                | (Limburg, 2001)                                       | yes                  |
| <i>Alosa alabamae</i>            | Clupeidae      | anadromous      |                                                                | (Schaffler et al., 2015)                              |                      |
| <i>Alosa alosa</i>               | Clupeidae      | anadromous      |                                                                | (Baglinière et al., 2003)                             | yes                  |

|                                   |             |                 |   |                                          |     |
|-----------------------------------|-------------|-----------------|---|------------------------------------------|-----|
| <i>Alosa fallax</i>               | Clupeidae   | anadromous      |   | (Aprahamian et al., 2003)                |     |
| <i>Alosa immaculata</i>           | Clupeidae   | anadromous      |   | (Acolas and Lambert, 2016)               |     |
| <i>Alosa kessleri</i>             | Clupeidae   | anadromous      |   | (Kuzishchin et al., 2020)                |     |
| <i>Alosa mediocris</i>            | Clupeidae   | anadromous      |   | (McBride and Holder, 2008)               |     |
| <i>Alosa pseudoharengus</i>       | Clupeidae   | anadromous      |   | (Walters et al., 2009)                   |     |
| <i>Alosa sapidissima</i>          | Clupeidae   | anadromous      |   | (McBride and Holder, 2008)               |     |
| <i>Alosa tanaica</i>              | Clupeidae   | anadromous      |   | (Acolas and Lambert, 2016)               |     |
| <i>Alosa volgensis</i>            | Clupeidae   | anadromous      |   | (Acolas and Lambert, 2016)               |     |
| <i>Anodontostoma chacunda</i>     | Clupeidae   | anadromous      | X | (Milton, 2009)                           |     |
| <i>Anodontostoma thailandiae</i>  | Clupeidae   | anadromous      | X | (Acolas and Lambert, 2016; Milton, 2009) |     |
| <i>Clupanodon thrissa</i>         | Clupeidae   | anadromous      | X | (Riede, 2004)                            |     |
| <i>Clupeonella cultriventris</i>  | Clupeidae   | anadromous      |   | (Bloom and Lovejoy, 2014)                |     |
| <i>Dorosoma cepedianum</i>        | Clupeidae   | anadromous      | X | (Acolas and Lambert, 2016)               |     |
| <i>Dorosoma petenense</i>         | Clupeidae   | anadromous      | X | (Acolas and Lambert, 2016)               |     |
| <i>Herklotsichthys gotoi</i>      | Clupeidae   | anadromous      | X | (Milton, 2009)                           |     |
| <i>Hilsa kelee</i>                | Clupeidae   | anadromous      | X | (Milton, 2009)                           |     |
| <i>Nematalosa galathea</i>        | Clupeidae   | anadromous      | X | (Acolas and Lambert, 2016; Milton, 2009) |     |
| <i>Nematalosa nasus</i>           | Clupeidae   | anadromous      | X | (Acolas and Lambert, 2016; Milton, 2009) |     |
| <i>Pellonula leonensis</i>        | Clupeidae   | anadromous      | X | (Milton, 2009)                           |     |
| <i>Pellonula vorax</i>            | Clupeidae   | anadromous      | X | (Acolas and Lambert, 2016; Milton, 2009) |     |
| <i>Tenualosa ilisha</i>           | Clupeidae   | anadromous      |   | (Arai et al., 2019)                      | yes |
| <i>Tenualosa reevesii</i>         | Clupeidae   | anadromous      |   | (Blaber et al., 2003)                    |     |
| <i>Tenualosa toli</i>             | Clupeidae   | anadromous      |   | (Milton et al., 1997)                    |     |
| <i>Leuciscus idus</i>             | Cyprinidae  | semi-anadromous |   | (Skovrind et al., 2016)                  | yes |
| <i>Pelecus cultratus</i>          | Cyprinidae  | anadromous      |   | (Acolas and Lambert, 2016)               |     |
| <i>Rutilus frisii</i>             | Cyprinidae  | anadromous      |   | (Kohestan-Eskandari et al., 2014)        |     |
| <i>Tribolodon brandtii</i>        | Cyprinidae  | anadromous      |   | (Sakai and Imai, 2005)                   |     |
| <i>Tribolodon hakonensis</i>      | Cyprinidae  | anadromous      |   | (Sakai et al., 2002)                     | yes |
| <i>Vimba vimba</i>                | Cyprinidae  | anadromous      |   | (Łuszczek-Trojnar et al., 2008)          |     |
| <i>Elops hawaiiensis</i>          | Elopidae    | anadromous      | X | (Milton, 2009)                           |     |
| <i>Anchoviella lepidentostole</i> | Engraulidae | anadromous      |   | (Milton, 2009)                           |     |
| <i>Colia ectenes</i>              | Engraulidae | anadromous      |   | (Duan et al., 2012)                      |     |
| <i>Coilia nasus</i>               | Engraulidae | anadromous      |   | (Dou et al., 2012)                       | yes |
| <i>Lycengraulis grossidens</i>    | Engraulidae | anadromous      |   | (Mai and Vieira, 2013)                   |     |
| <i>Stolephorus commersonii</i>    | Engraulidae | anadromous      | X | (Bijoy Nandan et al., 2012)              |     |

|                                  |                  |                 |   |                                         |     |
|----------------------------------|------------------|-----------------|---|-----------------------------------------|-----|
| <i>Microgadus tomcod</i>         | Gadidae          | anadromous      |   | (Couillard et al., 2011)                |     |
| <i>Lovettia sealii</i>           | Galaxiidae       | semi-anadromous |   | (Schmidt et al., 2014)                  |     |
| <i>Gasterosteus aculeatus</i>    | Gasterosteidae   | anadromous      |   | (Arai et al., 2003)                     | yes |
| <i>Pungitius pungitius</i>       | Gasterosteidae   | anadromous      |   | (Arai and Goto, 2008)                   | yes |
| <i>Geotria australis</i>         | Geotriidae       | anadromous      |   | (Miles et al., 2014)                    |     |
| <i>Leucopsarion petersii</i>     | Gobiidae         | anadromous      |   | (Kokita and Nohara, 2011)               |     |
| <i>Luciogobius guttatus</i>      | Gobiidae         | anadromous      |   | (Miyazaki and Terui, 2016; Riede, 2004) |     |
| <i>Lota lota</i>                 | Lotidae          | anadromous      | X | (Rohtla et al., 2014)                   | yes |
| <i>Mordacia lapicida</i>         | Mordaciidae      | anadromous      | X | (McDowall, 1999)                        |     |
| <i>Mordacia mordax</i>           | Mordaciidae      | anadromous      |   | (Miles et al., 2014)                    |     |
| <i>Morone americana</i>          | Moronidae        | anadromous      |   | (Acolas and Lambert, 2016)              |     |
| <i>Morone saxatilis</i>          | Moronidae        | anadromous      |   | (Secor et al., 1995)                    | yes |
| <i>Rhinomugil corsula</i>        | Mugilidae        | anadromous      | X | (Acolas and Lambert, 2016)              |     |
| <i>Pisodonophis boro</i>         | Ophichthidae     | anadromous      | X | (Acolas and Lambert, 2016)              |     |
| <i>Hypomesus japonicus</i>       | Osmeridae        | anadromous      |   | (Dodson et al., 2009)                   |     |
| <i>Hypomesus nipponensis</i>     | Osmeridae        | anadromous      |   | (Katayama et al., 2000)                 | yes |
| <i>Hypomesus olidus</i>          | Osmeridae        | anadromous      |   | (Acolas and Lambert, 2016)              | yes |
| <i>Hypomesus transpacificus</i>  | Osmeridae        | anadromous      |   | (Acolas and Lambert, 2016)              |     |
| <i>Osmerus dentex</i>            | Osmeridae        | anadromous      |   | (Dodson et al., 2009)                   |     |
| <i>Osmerus eperlanus</i>         | Osmeridae        | anadromous      |   | (Lyle and Maitland, 1997)               |     |
| <i>Osmerus mordax</i>            | Osmeridae        | anadromous      |   | (Bradbury et al., 2008)                 | yes |
| <i>Spirinchus lanceolatus</i>    | Osmeridae        | anadromous      |   | (Yatsuyanagi et al., 2020)              |     |
| <i>Spirinchus thaleichthys</i>   | Osmeridae        | anadromous      |   | (Acolas and Lambert, 2016)              | yes |
| <i>Thaleichthys pacificus</i>    | Osmeridae        | anadromous      |   | (Clarke et al., 2007)                   |     |
| <i>Pangasius krempfi</i>         | Pangasiidae      | anadromous      |   | (Hogan et al., 2007)                    |     |
| <i>Perca fluviatilis</i>         | Percidae         | semi-anadromous |   | (Nesbø et al., 1998)                    | yes |
| <i>Caspiomyzon wagneri</i>       | Petromyzontidae  | anadromous      |   | (Mark Shrimpton, 2012)                  |     |
| <i>Entosphenus tridentatus</i>   | Petromyzontidae  | anadromous      |   | (Clemens et al., 2013)                  |     |
| <i>Lampetra ayresii</i>          | Petromyzontidae  | anadromous      |   | (Acolas and Lambert, 2016)              |     |
| <i>Lampetra fluviatilis</i>      | Petromyzontidae  | anadromous      |   | (Morris and Pickering, 1976)            |     |
| <i>Lampetra tridentata</i>       | Petromyzontidae  | anadromous      |   | (Beamish and Levings, 1991)             |     |
| <i>Lethenteron camtschaticum</i> | Petromyzontidae  | anadromous      |   | (Acolas and Lambert, 2016)              | yes |
| <i>Lethenteron reissneri</i>     | Petromyzontidae  | anadromous      |   | (Acolas and Lambert, 2016)              |     |
| <i>Petromyzon marinus</i>        | Petromyzontidae  | anadromous      |   | (Waldman et al., 2008)                  |     |
| <i>Ilisha filigera</i>           | Pristigasteridae | anadromous      | X | (Milton, 2009)                          |     |

|                                 |                  |            |   |                                    |     |
|---------------------------------|------------------|------------|---|------------------------------------|-----|
| <i>Ilisha megaloptera</i>       | Pristigasteridae | anadromous | X | (Milton, 2009)                     |     |
| <i>Ilisha sirishai</i>          | Pristigasteridae | anadromous | X | (Milton, 2009)                     |     |
| <i>Pellona ditchela</i>         | Pristigasteridae | anadromous | X | (Milton, 2009)                     |     |
| <i>Retropinna tasmanica</i>     | Retropinnidae    | anadromous | X | (Miles et al., 2014)               |     |
| <i>Hemisanx prognathus</i>      | Salangidae       | anadromous |   | (Zhang et al., 2007)               |     |
| <i>Neosalanx jordani</i>        | Salangidae       | anadromous |   | (Dodson et al., 2009)              |     |
| <i>Neosalanx reganius</i>       | Salangidae       | anadromous |   | (Acolas and Lambert, 2016)         |     |
| <i>Salangichthys microdon</i>   | Salangidae       | anadromous |   | (Yamaguchi et al., 2004)           | yes |
| <i>Salanx ariakensis</i>        | Salangidae       | anadromous |   | (Shiao et al., 2016)               | yes |
| <i>Salanx cuvieri</i>           | Salangidae       | anadromous |   | (Dodson et al., 2009; Riede, 2004) |     |
| <i>Brachymystax lenok</i>       | Salmonidae       | anadromous | X | (Riede, 2004)                      |     |
| <i>Coregonus albula</i>         | Salmonidae       | anadromous |   | (Acolas and Lambert, 2016)         |     |
| <i>Coregonus artedii</i>        | Salmonidae       | anadromous |   | (Morin et al., 1982)               |     |
| <i>Coregonus autumnalis</i>     | Salmonidae       | anadromous |   | (Wilson, 1984)                     |     |
| <i>Coregonus clupeaformis</i>   | Salmonidae       | anadromous |   | (Morin et al., 1982)               |     |
| <i>Coregonus huntsmani</i>      | Salmonidae       | anadromous |   | (Acolas and Lambert, 2016)         |     |
| <i>Coregonus laurettae</i>      | Salmonidae       | anadromous |   | (Brown et al., 2008)               |     |
| <i>Coregonus lavaretus</i>      | Salmonidae       | anadromous |   | (Lehtonen et al., 1992)            |     |
| <i>Coregonus muksun</i>         | Salmonidae       | anadromous |   | (Acolas and Lambert, 2016)         |     |
| <i>Coregonus nasus</i>          | Salmonidae       | anadromous |   | (Brown et al., 2008)               | yes |
| <i>Coregonus oxyrinchus</i>     | Salmonidae       | anadromous |   | (Borcherding et al., 2014)         |     |
| <i>Coregonus pallasii</i>       | Salmonidae       | anadromous |   | (Acolas and Lambert, 2016)         |     |
| <i>Coregonus peled</i>          | Salmonidae       | anadromous |   | (Acolas and Lambert, 2016)         |     |
| <i>Coregonus pidschian</i>      | Salmonidae       | anadromous |   | (Acolas and Lambert, 2016)         |     |
| <i>Coregonus sardinella</i>     | Salmonidae       | anadromous |   | (Brown et al., 2008)               |     |
| <i>Hucho perryi</i>             | Salmonidae       | anadromous |   | (Edo et al., 2005)                 |     |
| <i>Oncorhynchus clarkii</i>     | Salmonidae       | anadromous |   | (Dodson et al., 2013)              | yes |
| <i>Oncorhynchus gorbuscha</i>   | Salmonidae       | anadromous |   | (Gallagher et al., 2013)           |     |
| <i>Oncorhynchus keta</i>        | Salmonidae       | anadromous |   | (Wood and Foote, 1996)             | yes |
| <i>Oncorhynchus kisutch</i>     | Salmonidae       | anadromous |   | (Dodson et al., 2013)              |     |
| <i>Oncorhynchus masou</i>       | Salmonidae       | anadromous |   | (Dodson et al., 2013)              | yes |
| <i>Oncorhynchus mykiss</i>      | Salmonidae       | anadromous |   | (Dodson et al., 2013)              | yes |
| <i>Oncorhynchus nerka</i>       | Salmonidae       | anadromous |   | (Dodson et al., 2013)              | yes |
| <i>Oncorhynchus tshawytscha</i> | Salmonidae       | anadromous |   | (Dodson et al., 2013)              |     |
| <i>Salmo labrax</i>             | Salmonidae       | anadromous |   | (Acolas and Lambert, 2016)         |     |

|                                |                |                 |   |                                            |     |
|--------------------------------|----------------|-----------------|---|--------------------------------------------|-----|
| <i>Salmo marmoratus</i>        | Salmonidae     | anadromous      |   | (Acolas and Lambert, 2016)                 |     |
| <i>Salmo salar</i>             | Salmonidae     | anadromous      |   | (Dodson et al., 2013)                      | yes |
| <i>Salmo trutta</i>            | Salmonidae     | anadromous      |   | (Dodson et al., 2013)                      | yes |
| <i>Salvelinus alpinus</i>      | Salmonidae     | anadromous      |   | (Dodson et al., 2013)                      | yes |
| <i>Salvelinus confluentus</i>  | Salmonidae     | anadromous      |   | (Austin et al., 2019; Dodson et al., 2013) | yes |
| <i>Salvelinus fontinalis</i>   | Salmonidae     | anadromous      |   | (Dodson et al., 2013)                      | yes |
| <i>Salvelinus leucomaenis</i>  | Salmonidae     | anadromous      |   | (Dodson et al., 2013)                      |     |
| <i>Salvelinus malma</i>        | Salmonidae     | anadromous      |   | (Dodson et al., 2013)                      |     |
| <i>Salvelinus namaycush</i>    | Salmonidae     | semi-anadromous |   | (Kissinger et al., 2016)                   | yes |
| <i>Stenodus leucichthys</i>    | Salmonidae     | anadromous      |   | (Brown et al., 2008)                       |     |
| <i>Takifugu obscurus</i>       | Tetraodontidae | anadromous      |   | (Jeong et al., 2014)                       | yes |
| <i>Takifugu ocellatus</i>      | Tetraodontidae | anadromous      |   | (Yang and Chen, 2008)                      |     |
| <i>Ambassis interrupta</i>     | Ambassidae     | catadromous     | X | (Milton, 2009)                             |     |
| <i>Anguilla anguilla</i>       | Anguillidae    | catadromous     |   | (Arai et al., 2006)                        | yes |
| <i>Anguilla australis</i>      | Anguillidae    | catadromous     |   | (Miles et al., 2014)                       |     |
| <i>Anguilla bengalensis</i>    | Anguillidae    | catadromous     |   | (Bijoy Nandan et al., 2012; Milton, 2009)  |     |
| <i>Anguilla bicolor</i>        | Anguillidae    | catadromous     |   | (Arai and Chino, 2019)                     | yes |
| <i>Anguilla celebesensis</i>   | Anguillidae    | catadromous     |   | (Milton, 2009)                             |     |
| <i>Anguilla dieffenbachii</i>  | Anguillidae    | catadromous     |   | (Arai et al., 2003)                        |     |
| <i>Anguilla interioris</i>     | Anguillidae    | catadromous     |   | (Arai and Chino, 2012)                     |     |
| <i>Anguilla japonica</i>       | Anguillidae    | catadromous     |   | (Tsukamoto and Arai, 2001)                 | yes |
| <i>Anguilla malgumora</i>      | Anguillidae    | catadromous     |   | (Arai and Chino, 2012)                     |     |
| <i>Anguilla marmorata</i>      | Anguillidae    | catadromous     |   | (Arai et al., 2013)                        | yes |
| <i>Anguilla megastoma</i>      | Anguillidae    | catadromous     |   | (Arai and Chino, 2012)                     |     |
| <i>Anguilla mossambica</i>     | Anguillidae    | catadromous     |   | (Whitfield, 2005)                          |     |
| <i>Anguilla nebulosa</i>       | Anguillidae    | catadromous     |   | (Arai and Chino, 2012)                     |     |
| <i>Anguilla obscura</i>        | Anguillidae    | catadromous     |   | (Miles et al., 2014)                       |     |
| <i>Anguilla rheinhardtii</i>   | Anguillidae    | catadromous     |   | (Miles et al., 2014)                       |     |
| <i>Anguilla rostrata</i>       | Anguillidae    | catadromous     |   | (Jessop et al., 2007)                      | yes |
| <i>Centropomus undecimalis</i> | Centropomidae  | catadromous     |   | (Lowerre-Barbieri et al., 2014)            |     |
| <i>Centropomus pectinatus</i>  | Centropomidae  | catadromous     | X | (Milton, 2009)                             |     |
| <i>Ethmalosa fimbriata</i>     | Clupeidae      | catadromous     |   | (Bloom and Lovejoy, 2014)                  |     |
| <i>Potamalosa richmondia</i>   | Clupeidae      | catadromous     |   | (Miles et al., 2014)                       |     |
| <i>Cottus kazika</i>           | Cottidae       | catadromous     |   | (Augspurger et al., 2017)                  |     |
| <i>Trachidermus fasciatus</i>  | Cottidae       | catadromous     | X | (Milton, 2009)                             |     |

|                                 |                 |                  |   |                                                     |     |
|---------------------------------|-----------------|------------------|---|-----------------------------------------------------|-----|
| <i>Eleotris annobonensis</i>    | Eleotridae      | catadromous      | X | (Milton, 2009)                                      |     |
| <i>Eleotris balia</i>           | Eleotridae      | catadromous      | X | (Milton, 2009)                                      |     |
| <i>Eleotris pisonis</i>         | Eleotridae      | catadromous      | X | (Milton, 2009)                                      |     |
| <i>Eleotris senegalensis</i>    | Eleotridae      | catadromous      | X | (Milton, 2009)                                      |     |
| <i>Eleotris vittata</i>         | Eleotridae      | catadromous      | X | (Milton, 2009)                                      |     |
| <i>Thryssa scratchleyi</i>      | Engraulidae     | catadromous      |   | (Miles et al., 2014)                                |     |
| <i>Kuhlia marginata</i>         | Kuhliidae       | catadromous      |   | (Feutry et al., 2013)                               |     |
| <i>Kuhlia malo</i>              | Kuhliidae       | catadromous      |   | (Feutry et al., 2013)                               |     |
| <i>Kuhlia rupestris</i>         | Kuhliidae       | catadromous      |   | (Augspurger et al., 2017)                           |     |
| <i>Khulia salelea</i>           | Kuhliidae       | catadromous      |   | (Feutry et al., 2013)                               |     |
| <i>Khulia sauvagii</i>          | Kuhliidae       | catadromous      |   | (Feutry et al., 2013)                               |     |
| <i>Lateolabrax japonicus</i>    | Lateolabracidae | catadromous      |   | (Fuji et al., 2018)                                 |     |
| <i>Lates calcarifer</i>         | Latidae         | catadromous      |   | (Miles et al., 2014)                                | yes |
| <i>Lutjanus goldiei</i>         | Lutjanidae      | catadromous      | X | (Milton, 2009)                                      |     |
| <i>Lutjanus maxweberi</i>       | Lutjanidae      | catadromous      | X | (Milton, 2009)                                      |     |
| <i>Megalops cyprinoides</i>     | Megalopidae     | catadromous      | X | (Miles et al., 2014)                                |     |
| <i>Agonostomus monticola</i>    | Mugilidae       | catadromous      | X | (Tulkani, 2017)                                     |     |
| <i>Agonostomus telfairii</i>    | Mugilidae       | catadromous      | X | (Milton, 2009)                                      |     |
| <i>Aldrichetta forsteri</i>     | Mugilidae       | catadromous      |   | (Chang and Iizuka, 2012)                            |     |
| <i>Chelon labrosus</i>          | Mugilidae       | catadromous      |   | (Gordoa, 2009)                                      |     |
| <i>Crenimugil heterocheilos</i> | Mugilidae       | catadromous      | X | (Milton, 2009)                                      |     |
| <i>Ellochelon vaigiensis</i>    | Mugilidae       | catadromous      | X | (Milton, 2009)                                      |     |
| <i>Joturus pichardi</i>         | Mugilidae       | catadromous      | X | (Tulkani, 2017)                                     |     |
| <i>Liza alata</i>               | Mugilidae       | catadromous      |   | (Villamarín et al., 2016)                           |     |
| <i>Liza aurata</i>              | Mugilidae       | catadromous      |   | (Como et al., 2018)                                 |     |
| <i>Liza falcipinnis</i>         | Mugilidae       | catadromous      |   | (Milton, 2009)                                      |     |
| <i>Liza grandisquamis</i>       | Mugilidae       | catadromous      |   | (Milton, 2009)                                      |     |
| <i>Liza haematocheila</i>       | Mugilidae       | catadromous      |   | (Chang and Iizuka, 2012)                            |     |
| <i>Liza macrolepsis</i>         | Mugilidae       | semi-catadromous |   | (Bijoy Nandan et al., 2012; Chang and Iizuka, 2012) |     |
| <i>Liza parsia</i>              | Mugilidae       | catadromous      |   | (Bijoy Nandan et al., 2012)                         |     |
| <i>Liza ramada</i>              | Mugilidae       | catadromous      |   | (Filipe et al., 2009)                               |     |
| <i>Liza richardsonii</i>        | Mugilidae       | catadromous      |   | (Chang and Iizuka, 2012)                            |     |
| <i>Liza rumadu</i>              | Mugilidae       | catadromous      |   | (Almeida, 1996)                                     |     |
| <i>Liza subviridis</i>          | Mugilidae       | catadromous      |   | (Chang and Iizuka, 2012)                            |     |

|                                 |                 |                      |   |                                             |     |
|---------------------------------|-----------------|----------------------|---|---------------------------------------------|-----|
| <i>Mugil cephalus</i>           | Mugilidae       | catadromous          |   | (Bijoy Nandan et al., 2012)                 | yes |
| <i>Mugil curema</i>             | Mugilidae       | catadromous          |   | (Albieri et al., 2010)                      |     |
| <i>Mugil liza</i>               | Mugilidae       | catadromous          |   | (Garbin et al., 2014)                       |     |
| <i>Mugil soiuy</i>              | Mugilidae       | catadromous          |   | (McDowall, 1997)                            |     |
| <i>Mugil trichodon</i>          | Mugilidae       | catadromous          |   | (Mai et al., 2018)                          |     |
| <i>Myxus capensis</i>           | Mugilidae       | catadromous          |   | (Strydom, 2003)                             |     |
| <i>Trachystoma petardi</i>      | Mugilidae       | catadromous          |   | (Miles et al., 2018)                        | yes |
| <i>Valamugil cunnesius</i>      | Mugilidae       | catadromous          |   | (Bijoy Nandan et al., 2012)                 |     |
| <i>Valamugil speigleri</i>      | Mugilidae       | catadromous          |   | (Bijoy Nandan et al., 2012)                 |     |
| <i>Gymnothorax polyuranodon</i> | Muraenidae      | catadromous          |   | (Tsukamoto et al., 2014)                    |     |
| <i>Macquaria novemaculeata</i>  | Percichthyidae  | catadromous          |   | (Chenoweth and Hughes, 1997)                |     |
| <i>Platichthys flesus</i>       | Pleuronectidae  | catadromous          |   | (Trancart et al., 2012)                     |     |
| <i>Rhombosolea retiaria</i>     | Pleuronectidae  | catadromous          |   | (McDowall, 2000)                            |     |
| <i>Pseudaphritis urvillii</i>   | Pseudaphritidae | catadromous - female |   | (Crook et al., 2010)                        |     |
| <i>Terapon jarbua</i>           | Terapontidae    | catadromous          | X | (Musarrat-ul-Ain et al., 2015; Riede, 2004) |     |
| <i>Notesthes robusta</i>        | Tetrarogidae    | catadromous          |   | (Milton, 2009)                              |     |
| <i>Ambassis miops</i>           | Ambassidae      | amphidromous         | X | (Miles et al., 2014; Milton, 2009)          |     |
| <i>Ambassis gymnocephalus</i>   | Ambassidae      | amphidromous         | X | (Milton, 2009)                              |     |
| <i>Ambassis kopsii</i>          | Ambassidae      | amphidromous         | X | (Milton, 2009)                              |     |
| <i>Ameiurus melas</i>           | Ariidae         | amphidromous         | X | (Milton, 2009)                              |     |
| <i>Arius jella</i>              | Ariidae         | amphidromous         | X | (Milton, 2009)                              |     |
| <i>Cephalocassia jatia</i>      | Ariidae         | amphidromous         | X | (Milton, 2009)                              |     |
| <i>Cochlefelis burmanica</i>    | Ariidae         | amphidromous         | X | (Milton, 2009)                              |     |
| <i>Hemiarius sona</i>           | Ariidae         | amphidromous         | X | (Milton, 2009)                              |     |
| <i>Hexanematichthys sagor</i>   | Ariidae         | amphidromous         | X | (Milton, 2009)                              |     |
| <i>Nemapteryx caelata</i>       | Ariidae         | amphidromous         | X | (Milton, 2009)                              |     |
| <i>Netuma thalassina</i>        | Ariidae         | amphidromous         | X | (Milton, 2009)                              |     |
| <i>Plicofollis platystomus</i>  | Ariidae         | amphidromous         | X | (Milton, 2009)                              |     |
| <i>Plicofollis tenuispinis</i>  | Ariidae         | amphidromous         |   | (Hashemi et al., 2013; Milton, 2009)        |     |
| <i>Atherina boyeri</i>          | Atherinidae     | amphidromous         | X | (Filipe et al., 2009)                       |     |
| <i>Carangaoides malabaricus</i> | Carangidae      | amphidromous         | X | (Bijoy Nandan et al., 2012)                 |     |
| <i>Caranx sexfasciatus</i>      | Carangidae      | amphidromous         | X | (Bijoy Nandan et al., 2012)                 |     |
| <i>Centropomus ensiferus</i>    | Centropomidae   | amphidromous         |   | (McBride and Matheson, 2011; Milton, 2009)  |     |
| <i>Centropomus medius</i>       | Centropomidae   | amphidromous         | X | (Milton, 2009)                              |     |
| <i>Centropomus nigrescens</i>   | Centropomidae   | amphidromous         | X | (Milton, 2009)                              |     |



|                                |                    |              |   |                                                     |     |
|--------------------------------|--------------------|--------------|---|-----------------------------------------------------|-----|
| <i>Centropomus parallelus</i>  | Centropomidae      | amphidromous |   | (McBride and Matheson, 2011; Milton, 2009)          |     |
| <i>Centropomus pectinatus</i>  | Centropomidae      | amphidromous |   | (McBride and Matheson, 2011)                        |     |
| <i>Centropomus robalito</i>    | Centropomidae      | amphidromous | X | (Milton, 2009)                                      |     |
| <i>Centropomus undecimalis</i> | Centropomidae      | amphidromous | X | (Milton, 2009)                                      |     |
| <i>Cheimarrichthys fosteri</i> | Cheimarrichthyidae | amphidromous |   | (Augspurger et al., 2017; McDowall, 2000)           |     |
| <i>Clupea harangus</i>         | Clupeidae          | amphidromous |   | (Augspurger et al., 2017)                           |     |
| <i>Sardinella melanura</i>     | Clupeidae          | amphidromous |   | (Elahi et al., 2017; Milton, 2009)                  |     |
| <i>Sprattus sprattus</i>       | Clupeidae          | amphidromous |   | (Augspurger et al., 2017)                           |     |
| <i>Cottus aleuticus</i>        | Cottidae           | amphidromous |   | (Augspurger et al., 2017)                           |     |
| <i>Cottus amblystomopsis</i>   | Cottidae           | amphidromous |   | (Augspurger et al., 2017)                           |     |
| <i>Cottus asper</i>            | Cottidae           | amphidromous |   | (Augspurger et al., 2017)                           |     |
| <i>Cottus hangiongensis</i>    | Cottidae           | amphidromous |   | (Augspurger et al., 2017; Miyazaki and Terui, 2016) |     |
| <i>Cottus pollux</i>           | Cottidae           | amphidromous |   | (Augspurger et al., 2017; Goto and Arai, 2003)      | yes |
| <i>Leptocottus armatus</i>     | Cottidae           | amphidromous |   | (McDowall, 1997)                                    |     |
| <i>Bostrychus africanus</i>    | Eleotridae         | amphidromous | X | (Milton, 2009)                                      |     |
| <i>Bostrychus sinensis</i>     | Eleotridae         | amphidromous | X | (Milton, 2009)                                      |     |
| <i>Bunaka gyrinoides</i>       | Eleotridae         | amphidromous | X | (Miles et al., 2014; Milton, 2009)                  |     |
| <i>Bunaka pinguis</i>          | Eleotridae         | amphidromous |   | (Donaldson and Myers, 2002; Milton, 2009)           |     |
| <i>Butis amboinensis</i>       | Eleotridae         | amphidromous |   | (Donaldson and Myers, 2002; Milton, 2009)           |     |
| <i>Butis butis</i>             | Eleotridae         | amphidromous |   | (Bijoy Nandan et al., 2012; Milton, 2009)           |     |
| <i>Butis humeralis</i>         | Eleotridae         | amphidromous | X | (Milton, 2009)                                      |     |
| <i>Butis koilomatodon</i>      | Eleotridae         | amphidromous | X | (Milton, 2009)                                      |     |
| <i>Butis melanostigma</i>      | Eleotridae         | amphidromous | X | (Milton, 2009)                                      |     |
| <i>Dormitator latifrons</i>    | Eleotridae         | amphidromous |   | (Augspurger et al., 2017; McDowall, 2009)           |     |
| <i>Dormitator maculatus</i>    | Eleotridae         | amphidromous |   | (Augspurger et al., 2017; Milton, 2009)             |     |
| <i>Eleotris acanthopoma</i>    | Eleotridae         | amphidromous |   | (Milton, 2009; Shen et al., 1998)                   |     |
| <i>Eleotris amblyopsis</i>     | Eleotridae         | amphidromous |   | (Augspurger et al., 2017; Nordlie, 2012)            |     |
| <i>Eleotris fusca</i>          | Eleotridae         | amphidromous |   | (Bijoy Nandan et al., 2012; Mennesson et al., 2015) |     |
| <i>Eleotris melanosoma</i>     | Eleotridae         | amphidromous |   | (Maeda and Tachihara, 2005)                         |     |
| <i>Eleotris oxycephala</i>     | Eleotridae         | amphidromous | X | (Xia et al., 2015)                                  |     |
| <i>Eleotris perniger</i>       | Eleotridae         | amphidromous |   | (Frotté et al., 2019)                               |     |
| <i>Eleotris picta</i>          | Eleotridae         | amphidromous |   | (Augspurger et al., 2017)                           |     |
| <i>Eleotris sandwicensis</i>   | Eleotridae         | amphidromous |   | (Heim-Ballew et al., 2020)                          | yes |
| <i>Giuris margaritacea</i>     | Eleotridae         | amphidromous | X | (Miles et al., 2014)                                |     |

|                                  |             |              |   |                                                      |     |
|----------------------------------|-------------|--------------|---|------------------------------------------------------|-----|
| <i>Gobiomorphus australis</i>    | Eleotridae  | amphidromous | X | (Miles et al., 2014)                                 |     |
| <i>Gobiomorphus cotidianus</i>   | Eleotridae  | amphidromous |   | (Augspurger et al., 2017)                            | yes |
| <i>Gobiomorphus gobioides</i>    | Eleotridae  | amphidromous |   | (Augspurger et al., 2017)                            |     |
| <i>Gobiomorphus hubbsi</i>       | Eleotridae  | amphidromous |   | (Augspurger et al., 2017; Jarvis et al., 2018)       |     |
| <i>Gobiomorphus huttoni</i>      | Eleotridae  | amphidromous |   | (Augspurger et al., 2017)                            |     |
| <i>Gobiomorus dormitor</i>       | Eleotridae  | amphidromous |   | (Augspurger et al., 2017; Smith and Kwak, 2014)      |     |
| <i>Gobiomorus maculatus</i>      | Eleotridae  | amphidromous |   | (Augspurger et al., 2017)                            |     |
| <i>Guavina guavina</i>           | Eleotridae  | amphidromous |   | (Augspurger et al., 2017; Milton, 2009)              |     |
| <i>Hypseleotris cyprinoides</i>  | Eleotridae  | amphidromous |   | (Donaldson and Myers, 2002)                          |     |
| <i>Hypseleotris guentheri</i>    | Eleotridae  | amphidromous |   | (Donaldson and Myers, 2002)                          |     |
| <i>Ophieleotris aporos</i>       | Eleotridae  | amphidromous |   | (Donaldson and Myers, 2002; Milton, 2009)            |     |
| <i>Ophiocara porocephala</i>     | Eleotridae  | amphidromous |   | (Donaldson and Myers, 2002; Milton, 2009)            |     |
| <i>Thryssa dussumieri</i>        | Engraulidae | amphidromous | X | (Bijoy Nandan et al., 2012; Milton, 2009)            |     |
| <i>Thryssa gautamiensis</i>      | Engraulidae | amphidromous | X | (Milton, 2009)                                       |     |
| <i>Thryssa hamaltonii</i>        | Engraulidae | amphidromous | X | (Milton, 2009)                                       |     |
| <i>Thryssa kammalensoides</i>    | Engraulidae | amphidromous | X | (Milton, 2009)                                       |     |
| <i>Thryssa malabarica</i>        | Engraulidae | amphidromous | X | (Bijoy Nandan et al., 2012)                          |     |
| <i>Aplochiton taeniatus</i>      | Galaxiidae  | amphidromous |   | (Alò et al., 2019; Augspurger et al., 2017)          |     |
| <i>Aplochiton marinus</i>        | Galaxiidae  | amphidromous |   | (Alò et al., 2019)                                   |     |
| <i>Aplochiton zebra</i>          | Galaxiidae  | amphidromous |   | (Augspurger et al., 2017)                            |     |
| <i>Galaxias argenteus</i>        | Galaxiidae  | amphidromous |   | (Augspurger et al., 2017)                            |     |
| <i>Galaxias brevipinnis</i>      | Galaxiidae  | amphidromous |   | (Augspurger et al., 2017)                            |     |
| <i>Galaxias fasciatus</i>        | Galaxiidae  | amphidromous |   | (Augspurger et al., 2017)                            |     |
| <i>Galaxias maculatus</i>        | Galaxiidae  | amphidromous |   | (Augspurger et al., 2017; Hickford and Schiel, 2016) | yes |
| <i>Galaxias postvectis</i>       | Galaxiidae  | amphidromous |   | (Franklin and Gee, 2019)                             |     |
| <i>Galaxias truttaceus</i>       | Galaxiidae  | amphidromous |   | (Augspurger et al., 2017)                            | yes |
| <i>Neochanna cleaveri</i>        | Galaxiidae  | amphidromous |   | (McDowall, 2004; Miles et al., 2014)                 |     |
| <i>Eucinostomus melanopterus</i> | Gerreidae   | amphidromous | X | (Milton, 2009)                                       |     |
| <i>Gerres cinereus</i>           | Gerreidae   | amphidromous | X | (Milton, 2009)                                       |     |
| <i>Gerres erythrourus</i>        | Gerreidae   | amphidromous | X | (Bijoy Nandan et al., 2012)                          |     |
| <i>Gerres filamentosus</i>       | Gerreidae   | amphidromous | X | (Milton, 2009)                                       |     |
| <i>Gerres limbatus</i>           | Gerreidae   | amphidromous | X | (Milton, 2009)                                       |     |
| <i>Gerres longirostris</i>       | Gerreidae   | amphidromous | X | (Milton, 2009)                                       |     |
| <i>Gerres seifer</i>             | Gerreidae   | amphidromous | X | (Bijoy Nandan et al., 2012; Milton, 2009)            |     |

|                                       |              |                   |   |                                                     |     |
|---------------------------------------|--------------|-------------------|---|-----------------------------------------------------|-----|
| <i>Gobiesox cephalus</i>              | Gobiesocidae | semi-amphidromous |   | (Frotté et al., 2019)                               | yes |
| <i>Acantrogobius caninus</i>          | Gobiidae     | amphidromous      |   | (Palavai, 2009)                                     |     |
| <i>Acanthogobius lactipes</i>         | Gobiidae     | amphidromous      |   | (Miyazaki and Terui, 2016)                          |     |
| <i>Awaous acritosus</i>               | Gobiidae     | amphidromous      |   | (Augspurger et al., 2017)                           | yes |
| <i>Awaous banana</i>                  | Gobiidae     | amphidromous      |   | (Augspurger et al., 2017; Smith and Kwak, 2014)     | yes |
| <i>Awaous bustamantei</i>             | Gobiidae     | amphidromous      | X | (Schliewen, 2012)                                   |     |
| <i>Awaous grammepomus</i>             | Gobiidae     | amphidromous      | X | (Milton, 2009)                                      |     |
| <i>Awaous guamensis</i>               | Gobiidae     | amphidromous      |   | (Augspurger et al., 2017)                           |     |
| <i>Awaous lateristriga</i>            | Gobiidae     | amphidromous      | X | (Schliewen, 2012)                                   |     |
| <i>Awaous melanocephalus</i>          | Gobiidae     | amphidromous      |   | (Shen et al., 1998; Shiao et al., 2015)             |     |
| <i>Awaous ocellaris</i>               | Gobiidae     | amphidromous      | X | (Milton, 2009)                                      |     |
| <i>Awaous stamineus</i>               | Gobiidae     | amphidromous      |   | (Augspurger et al., 2017; Hogan et al., 2017)       | yes |
| <i>Awaous tajasica</i>                | Gobiidae     | amphidromous      |   | (Trevisan dos Santos, 2016)                         |     |
| <i>Awaous transandeanus</i>           | Gobiidae     | amphidromous      | X | (Lyons and Schneider, 1990)                         |     |
| <i>Cotylopus acutipinnis</i>          | Gobiidae     | amphidromous      |   | (Milton, 2009; Teichert et al., 2014)               |     |
| <i>Glossogobius aureus</i>            | Gobiidae     | amphidromous      |   | (Miles et al., 2014; Shiao et al., 2015)            |     |
| <i>Glossogobius celebius</i>          | Gobiidae     | amphidromous      |   | (Milton, 2009; Shen et al., 1998)                   |     |
| <i>Glossogobius giuris</i>            | Gobiidae     | amphidromous      |   | (Miles et al., 2014; Milton, 2009)                  |     |
| <i>Gobioides broussonnetii</i>        | Gobiidae     | amphidromous      | X | (Milton, 2009)                                      |     |
| <i>Gobioides sagitta</i>              | Gobiidae     | amphidromous      | X | (Milton, 2009)                                      |     |
| <i>Gobionellus occidentalis</i>       | Gobiidae     | amphidromous      | X | (Milton, 2009)                                      |     |
| <i>Gobionellus oceanicus</i>          | Gobiidae     | amphidromous      | X | (Milton, 2009)                                      |     |
| <i>Gobionellus thoropsis</i>          | Gobiidae     | amphidromous      | X | (Milton, 2009)                                      |     |
| <i>Gymnogobius petschiliensis</i>     | Gobiidae     | amphidromous      |   | (Oto, 2019)                                         |     |
| <i>Gymnogobius opperiens</i>          | Gobiidae     | amphidromous      |   | (Miyazaki and Terui, 2016)                          |     |
| <i>Gymnogobius urotaenia</i>          | Gobiidae     | amphidromous      |   | (Miyazaki and Terui, 2016)                          |     |
| <i>Lentipes armatus</i>               | Gobiidae     | amphidromous      | X | (Milton, 2009)                                      |     |
| <i>Lentipes concolor</i>              | Gobiidae     | amphidromous      |   | (Augspurger et al., 2017; Heim-Ballew et al., 2020) | yes |
| <i>Lentipes whittenorum</i>           | Gobiidae     | amphidromous      | X | (Milton, 2009)                                      |     |
| <i>Oligolepis acutipennis</i>         | Gobiidae     | amphidromous      |   | (Shen et al., 1998)                                 |     |
| <i>Parasicydium bandama</i>           | Gobiidae     | amphidromous      | X | (Schliewen, 2012)                                   |     |
| <i>Periophthalmus argentilineatus</i> | Gobiidae     | amphidromous      | X | (Milton, 2009)                                      |     |
| <i>Periophthalmus barbarus</i>        | Gobiidae     | amphidromous      | X | (Milton, 2009)                                      |     |
| <i>Periophthalmus malaccensis</i>     | Gobiidae     | amphidromous      | X | (Milton, 2009)                                      |     |

|                                        |          |              |   |                                                     |     |
|----------------------------------------|----------|--------------|---|-----------------------------------------------------|-----|
| <i>Periophthalmus modestus</i>         | Gobiidae | amphidromous | X | (Milton, 2009)                                      |     |
| <i>Periophthalmus novemradiatus</i>    | Gobiidae | amphidromous |   | (Milton, 2009; Rahman et al., 2015)                 |     |
| <i>Periophthalmus weberi</i>           | Gobiidae | amphidromous | X | (Milton, 2009)                                      |     |
| <i>Periophthalmodon schlosseri</i>     | Gobiidae | amphidromous | X | (Milton, 2009)                                      |     |
| <i>Periophthalmodon septemradiatus</i> | Gobiidae | amphidromous | X | (Milton, 2009)                                      |     |
| <i>Porogobius schlegelii</i>           | Gobiidae | amphidromous | X | (Milton, 2009)                                      |     |
| <i>Pseudapocryptes elongatus</i>       | Gobiidae | amphidromous | X | (Milton, 2009)                                      |     |
| <i>Pseudogobius javanicus</i>          | Gobiidae | amphidromous | X | (Milton, 2009)                                      |     |
| <i>Pseudogobius melanostictus</i>      | Gobiidae | amphidromous | X | (Milton, 2009)                                      |     |
| <i>Pseudogobius poicilosoma</i>        | Gobiidae | amphidromous | X | (Milton, 2009)                                      |     |
| <i>Redigobius balteatus</i>            | Gobiidae | amphidromous |   | (Donaldson and Myers, 2002; Milton, 2009)           |     |
| <i>Redigobius bikolanus</i>            | Gobiidae | amphidromous |   | (Shen et al., 1998)                                 |     |
| <i>Redigobius dispar</i>               | Gobiidae | amphidromous | X | (Milton, 2009)                                      |     |
| <i>Redigobius horiae</i>               | Gobiidae | amphidromous |   | (Donaldson and Myers, 2002)                         |     |
| <i>Redigobius macrostoma</i>           | Gobiidae | amphidromous | X | (Milton, 2009)                                      |     |
| <i>Redigobius roemeri</i>              | Gobiidae | amphidromous |   | (Donaldson and Myers, 2002; Milton, 2009)           |     |
| <i>Redigobius sapangus</i>             | Gobiidae | amphidromous |   | (Donaldson and Myers, 2002; Milton, 2009)           |     |
| <i>Rhinogobius brunneus</i>            | Gobiidae | amphidromous |   | (Augspurger et al., 2017; Iguchi and Mizuno, 1999)  |     |
| <i>Rhinogobius giurinus</i>            | Gobiidae | amphidromous |   | (Shiao et al., 2015)                                |     |
| <i>Rhinogobius similis</i>             | Gobiidae | amphidromous |   | (Iida et al., 2017)                                 |     |
| <i>Rhinogobius sp.</i>                 | Gobiidae | amphidromous |   | (Augspurger et al., 2017; Tsunagawa and Arai, 2008) | yes |
| <i>Schismatogobius sp.</i>             | Gobiidae | amphidromous |   | (Keith, 2003)                                       |     |
| <i>Schismatogobius roxasi</i>          | Gobiidae | amphidromous | X | (Milton, 2009)                                      |     |
| <i>Sicydium brevifile</i>              | Gobiidae | amphidromous | X | (Schliewen, 2012)                                   |     |
| <i>Sicydium bustamantei</i>            | Gobiidae | amphidromous | X | (Schliewen, 2012)                                   |     |
| <i>Sicydium crenilabrum</i>            | Gobiidae | amphidromous | X | (Schliewen, 2012)                                   |     |
| <i>Sicydium multipunctatum</i>         | Gobiidae | amphidromous | X | (González-Murcia and Álvarez, 2018)                 |     |
| <i>Sicydium plumieri</i>               | Gobiidae | amphidromous |   | (Frotté et al., 2019; Milton, 2009)                 |     |
| <i>Sicydium punctatum</i>              | Gobiidae | amphidromous |   | (Augspurger et al., 2017; Bell et al., 1995)        |     |
| <i>Sicydium salvini</i>                | Gobiidae | amphidromous |   | (Lyons and Schneider, 1990)                         |     |
| <i>Sicyopterus aiensis</i>             | Gobiidae | amphidromous |   | (Augspurger et al., 2017)                           |     |
| <i>Sicyopterus cynocephalus</i>        | Gobiidae | amphidromous | X | (Ebner et al., 2017)                                |     |
| <i>Sicyopterus fuliag</i>              | Gobiidae | amphidromous | X | (Milton, 2009)                                      |     |
| <i>Sicyopterus griseus</i>             | Gobiidae | amphidromous | X | (Milton, 2009)                                      |     |

|                                     |            |              |   |                                                    |     |
|-------------------------------------|------------|--------------|---|----------------------------------------------------|-----|
| <i>Sicyopterus japonicus</i>        | Gobiidae   | amphidromous |   | (Augspurger et al., 2017; Shen et al., 1998)       |     |
| <i>Sicyopterus lacrymosus</i>       | Gobiidae   | amphidromous | X | (Milton, 2009)                                     |     |
| <i>Sicyopterus lagocephalus</i>     | Gobiidae   | amphidromous |   | (Augspurger et al., 2017)                          |     |
| <i>Sicyopterus macrostetholepis</i> | Gobiidae   | amphidromous | X | (Milton, 2009)                                     |     |
| <i>Sicyopterus micrurus</i>         | Gobiidae   | amphidromous | X | (Milton, 2009)                                     |     |
| <i>Sicyopterus rapa</i>             | Gobiidae   | amphidromous | X | (Milton, 2009)                                     |     |
| <i>Sicyopterus sarasini</i>         | Gobiidae   | amphidromous |   | (Augspurger et al., 2017)                          |     |
| <i>Sicyopterus stimpsoni</i>        | Gobiidae   | amphidromous |   | (Heim-Ballew et al., 2020)                         |     |
| <i>Sicyopus auxilimentus</i>        | Gobiidae   | amphidromous | X | (Milton, 2009)                                     |     |
| <i>Sicyopus jonklaasi</i>           | Gobiidae   | amphidromous | X | (Milton, 2009)                                     |     |
| <i>Sicyopus leprurus</i>            | Gobiidae   | amphidromous | X | (Milton, 2009)                                     |     |
| <i>Sicyopus zosterophorum</i>       | Gobiidae   | amphidromous |   | (Augspurger et al., 2017; Taillebois et al., 2015) |     |
| <i>Smilosicyopus chloe</i>          | Gobiidae   | amphidromous |   | (Taillebois et al., 2015)                          |     |
| <i>Stenogobius blokzeyli</i>        | Gobiidae   | amphidromous | X | (Milton, 2009)                                     |     |
| <i>Stenogobius fasciatus</i>        | Gobiidae   | amphidromous | X | (McBride and Matheson, 2011)                       |     |
| <i>Stenogobius fehlmanni</i>        | Gobiidae   | amphidromous |   | (Donaldson and Myers, 2002)                        |     |
| <i>Stenogobius genivittatus</i>     | Gobiidae   | amphidromous |   | (Shen et al., 1998; Shiao et al., 2015)            |     |
| <i>Stenogobius grammepomus</i>      | Gobiidae   | amphidromous |   | (Palavai, 2009)                                    |     |
| <i>Stenogobius hawaiiensis</i>      | Gobiidae   | amphidromous |   | (Heim-Ballew et al., 2020)                         | yes |
| <i>Stiphodon alcedo</i>             | Gobiidae   | amphidromous |   | (Maeda et al., 2011)                               |     |
| <i>Stiphodon aureorostrum</i>       | Gobiidae   | amphidromous | X | (Milton, 2009)                                     |     |
| <i>Stiphodon caeruleus</i>          | Gobiidae   | amphidromous |   | (Chabarria et al., 2014)                           |     |
| <i>Stiphodon elegans</i>            | Gobiidae   | amphidromous |   | (Milton, 2009; Shiao et al., 2015)                 |     |
| <i>Stiphodon larsen</i>             | Gobiidae   | amphidromous |   | (McDowall, 2010)                                   |     |
| <i>Stiphodon niraikanaiensis</i>    | Gobiidae   | amphidromous |   | (Maeda, 2014)                                      |     |
| <i>Stiphodon percnopterygius</i>    | Gobiidae   | amphidromous |   | (Iida et al., 2017; McDowall, 2009)                |     |
| <i>Stiphodon rutilaureus</i>        | Gobiidae   | amphidromous | X | (Ebner and Thuesen, 2011)                          |     |
| <i>Stiphodon semoni</i>             | Gobiidae   | amphidromous |   | (Keith, 2003)                                      |     |
| <i>Stiphodon surrufus</i>           | Gobiidae   | amphidromous | X | (Milton, 2009)                                     |     |
| <i>Taenoides cirratus</i>           | Gobiidae   | amphidromous |   | (Bijoy Nandan et al., 2012)                        |     |
| <i>Taenoides buchanani</i>          | Gobiidae   | amphidromous |   | (Bijoy Nandan et al., 2012)                        |     |
| <i>Tridentiger brevispinis</i>      | Gobiidae   | amphidromous |   | (Miyazaki and Terui, 2016)M                        |     |
| <i>Tridentiger kuroiwae</i>         | Gobiidae   | amphidromous |   | (Iida et al., 2017)                                |     |
| <i>Zappa confluentus</i>            | Gobiidae   | amphidromous | X | (Milton, 2009)                                     |     |
| <i>Pomadasy maculatus</i>           | Haemulidae | amphidromous | X | (Ahmed and Bat, 2016; Riede, 2004)                 |     |

|                                 |                  |              |   |                                                     |
|---------------------------------|------------------|--------------|---|-----------------------------------------------------|
| <i>Kuhlia caudavittata</i>      | Kuhliidae        | amphidromous |   | (Augspurger et al., 2017)                           |
| <i>Kuhlia mugil</i>             | Kuhliidae        | amphidromous |   | (Augspurger et al., 2017)                           |
| <i>Kuhlia petiti</i>            | Kuhliidae        | amphidromous |   | (Augspurger et al., 2017)                           |
| <i>Kuhlia sandvicensis</i>      | Kuhliidae        | amphidromous |   | (Benson and Michael Fitzsimons, 2002; Milton, 2009) |
| <i>Kuhlia xenura</i>            | Kuhliidae        | amphidromous |   | (Augspurger et al., 2017)                           |
| <i>Agonostomus monticola</i>    | Mugilidae        | amphidromous |   | (Frotté et al., 2019)                               |
| <i>Liza macrolepis</i>          | Mugilidae        | amphidromous | X | (Milton, 2009)                                      |
| <i>Liza melinoptera</i>         | Mugilidae        | amphidromous | X | (Milton, 2009)                                      |
| <i>Liza subviridis</i>          | Mugilidae        | amphidromous | X | (Milton, 2009)                                      |
| <i>Liza vaigiensis</i>          | Mugilidae        | amphidromous | X | (Milton, 2009)                                      |
| <i>Valamugil buchanani</i>      | Mugilidae        | amphidromous | X | (Milton, 2009)                                      |
| <i>Plecoglossus altivelis</i>   | Plecoglossidae   | amphidromous |   | (Arai, 2006; Murase and Iguchi, 2019)               |
| <i>Plotosus canius</i>          | Plotosidae       | amphidromous | X | (Samani et al., 2016)                               |
| <i>Ilisha kampeni</i>           | Pristigasteridae | amphidromous | X | (Milton, 2009)                                      |
| <i>Ilisha melastoma</i>         | Pristigasteridae | amphidromous | X | (Milton, 2009)                                      |
| <i>Ilisha novacula</i>          | Pristigasteridae | amphidromous | X | (Milton, 2009)                                      |
| <i>Prototroctes maraena</i>     | Retropinnidae    | amphidromous |   | (Augspurger et al., 2017)                           |
| <i>Prototroctes oxyrhynchus</i> | Retropinnidae    | amphidromous |   | (Augspurger et al., 2017)                           |
| <i>Retropinna retropinna</i>    | Retropinnidae    | amphidromous |   | (Augspurger et al., 2017)                           |
| <i>Retropinna semoni</i>        | Retropinnidae    | amphidromous |   | (Augspurger et al., 2017)                           |
| <i>Rhyacichthys aspro</i>       | Rhyacichthyidae  | amphidromous |   | (Donaldson and Myers, 2002; Milton, 2009)           |
| <i>Rhyacichthys guilberti</i>   | Rhyacichthyidae  | amphidromous |   | (Milton, 2009; Tabouret et al., 2014)               |
| <i>Johnius belangerii</i>       | Sciaenidae       | amphidromous | X | (Bijoy Nandan et al., 2012)                         |
| <i>Johnius coitor</i>           | Sciaenidae       | amphidromous | X | (Sakar et al., 2018)                                |
| <i>Otolithoides biauritus</i>   | Sciaenidae       | amphidromous | X | (Bijoy Nandan et al., 2012)                         |
| <i>Silonia silondia</i>         | Schilbeidae      | amphidromous |   | (Flura et al., 2018)                                |
| <i>Hippichthys cyanospilus</i>  | Syngnathidae     | amphidromous |   | (Donaldson and Myers, 2002; Milton, 2009)           |
| <i>Hippichthys spicifer</i>     | Syngnathidae     | amphidromous |   | (Donaldson and Myers, 2002; Milton, 2009)           |
| <i>Microphis brachyurus</i>     | Syngnathidae     | amphidromous |   | (McBride and Matheson, 2011)                        |
| <i>Microphis leiaspis</i>       | Syngnathidae     | amphidromous |   | (Ishihara and Tachihara, 2008; Milton, 2009)        |
| <i>Syngnathus abaster</i>       | Syngnathidae     | amphidromous |   | (Filipe et al., 2009)                               |
| <i>Toxotes blythii</i>          | Toxotidae        | amphidromous | X | (Milton, 2009)                                      |
| <i>Toxotes chatareus</i>        | Toxotidae        | amphidromous | X | (Milton, 2009)                                      |
| <i>Toxotes jaculatrix</i>       | Toxotidae        | amphidromous | X | (Milton, 2009)                                      |



**Table S2.** References of diadromous taxa's ancestral environment from Figure 1.

| <b>Taxa</b>        | <b>Origin</b>      | <b>Reference</b>                                                                                            |
|--------------------|--------------------|-------------------------------------------------------------------------------------------------------------|
| Acipenseriformes   | Fresh water        | Sulak & Randall 2002                                                                                        |
| Ambassidae         | Marine             | Martin 1990                                                                                                 |
| Anguilliformes     | Marine             | Corush 2019                                                                                                 |
| Atheriniformes     | Marine             | Campanella <i>et al.</i> 2015                                                                               |
| Characiformes      | Marine             | Chen <i>et al.</i> 2013                                                                                     |
| Clupeiformes       | Marine             | Bloom & Lovejoy 2014                                                                                        |
| Cypriniformes      | Fresh water        | Imoto <i>et al.</i> 2013                                                                                    |
| Elopiformes        | Unknown            |                                                                                                             |
| Gadiformes         | Unknown            |                                                                                                             |
| Galaxiiformes      | Unknown            | Vega & Wiens 2012                                                                                           |
| Gobiesoformes      | Unknown            |                                                                                                             |
| Gobiiformes        | Fresh water        | Thacker 2009                                                                                                |
| Lutjanidae         | Unknown            |                                                                                                             |
| Moroniformes       | Unknown            |                                                                                                             |
| Mugiliformes       | Unknown            |                                                                                                             |
| Osmeriformes       | Unknown            | Vega & Wiens 2012                                                                                           |
| Perciformes        | Marine/Catadromous | Cottidae (Dickman, 1995), Terapontidae (Davis <i>et al.</i> , 2012)/Kuhliidae (Feutry <i>et al.</i> , 2013) |
| Petromyzontiformes | Fresh water        | Bartels <i>et al.</i> 2017                                                                                  |
| Pleuronectiformes  | Marine             | Azevedo <i>et al.</i> 2008                                                                                  |
| Salmoniformes      | Fresh water        | Wang <i>et al.</i> 2011                                                                                     |
| Siluriformes       | Marine             | Betancur-R 2010                                                                                             |
| Syngnathiformes    | Unknown            |                                                                                                             |
| Tetraodontiformes  | Marine             | Yamanoue <i>et al.</i> 2011                                                                                 |



**Table S3.** A representation of putative genes that differentiate migratory vs. non-migratory populations reported by different studies.

| Function                                              | Example of putative genes                                                                                                                                                                                                                                                                                       | Reference                                                                                                                                                                                              |
|-------------------------------------------------------|-----------------------------------------------------------------------------------------------------------------------------------------------------------------------------------------------------------------------------------------------------------------------------------------------------------------|--------------------------------------------------------------------------------------------------------------------------------------------------------------------------------------------------------|
| Cell junction/adhesion                                | Tight junction protein ZO-3, Occludin, Protocadherin-18, Cadherin-8                                                                                                                                                                                                                                             | Hale <i>et al.</i> 2013; Kozak <i>et al.</i> 2014                                                                                                                                                      |
| Cell proliferation                                    | Epidermal growth factor receptor kinase                                                                                                                                                                                                                                                                         | Kozak <i>et al.</i> 2014                                                                                                                                                                               |
| Cytoskeletal connections                              | Obscurin-like 1                                                                                                                                                                                                                                                                                                 | Morris <i>et al.</i> 2014                                                                                                                                                                              |
| Reproduction                                          | Zonadhesin-like, Estrogen receptor, MORC family CW-type zinc finger, Round spermatid basic protein 1-like, RING finger protein 114, life history divergence [9], Gonadotropin-releasing hormone (GnRH), Sperm-associated antigen 16, Gonadotropin subunit beta-2                                                | Mavarez <i>et al.</i> 2009; Hale <i>et al.</i> 2013; Mateus <i>et al.</i> 2013; Kozak <i>et al.</i> 2014                                                                                               |
| Growth/differentiation factor, hormone, FSH inhibitor | Inhibin, alpha, growth hormone 2 (GH2)                                                                                                                                                                                                                                                                          | Hale <i>et al.</i> 2013; Morris <i>et al.</i> 2014                                                                                                                                                     |
| Involved in immunity                                  | NOD-like receptor family CARD domain containing 5, Immunoglobulin heavy chain (IgD-A) gene, MHC class I a region                                                                                                                                                                                                | Hale <i>et al.</i> 2013; Morris <i>et al.</i> 2014                                                                                                                                                     |
| Ion transport                                         | ATPase, Na <sup>+</sup> /K <sup>+</sup> transporting alpha 1, Solute carrier family 9, 10, 12 (Na <sup>+</sup> /H <sup>+</sup> exchanger), ATPase, H <sup>+</sup> transporting, Sodium/potassium/calcium exchanger, Potassium voltage-gated channel subfamily H, Na <sup>+</sup> /Cl <sup>-</sup> cotransporter | Mavarez <i>et al.</i> 2009; Hale <i>et al.</i> 2013; Dennenmoser <i>et al.</i> 2017; Velotta <i>et al.</i> 2017; Brennan <i>et al.</i> 2018; Willoughby <i>et al.</i> 2018; Delgado <i>et al.</i> 2019 |
| Microtubule attachment to the centromere              | Bardet-Biedl syndrome 4 protein                                                                                                                                                                                                                                                                                 | Kozak <i>et al.</i> 2014                                                                                                                                                                               |
| Enzymes                                               | Glutamate dehydrogenase (GDH), d1-pyrroline-5-carboxylase synthase (P5CS), Carbonic anhydrase, Malate dehydrogenase, FMS-related tyrosine kinase 4, Alkaline ceramidase 1, Protein kinase D3                                                                                                                    | Hale <i>et al.</i> 2013; Dennenmoser <i>et al.</i> 2017; Debiasse <i>et al.</i> 2018; Willoughby <i>et al.</i> 2018                                                                                    |
| Myocyte cytoskeletal development                      | SPEG, Myosin regulatory light chain 2, Myostatin 2b (MSTN2)                                                                                                                                                                                                                                                     | Hale <i>et al.</i> 2013; Morris <i>et al.</i> 2014                                                                                                                                                     |
| Negative regulator of cell proliferation              | Insulin-like growth factor-binding protein 1, 2a, 5                                                                                                                                                                                                                                                             | Morris <i>et al.</i> 2014; Kusakabe <i>et al.</i> 2017; Velotta <i>et al.</i> 2017                                                                                                                     |
| Osmosensing                                           | Interleukin receptor 17c, 22a, Mitogen-activated protein kinase 1, 8, 13                                                                                                                                                                                                                                        | Velotta <i>et al.</i> 2017                                                                                                                                                                             |
| Osmotic/salinity stress                               | Glucocorticoid receptor, Aldehyde dehydrogenase 7, 9, Vasotocin                                                                                                                                                                                                                                                 | Mavarez <i>et al.</i> 2009; Mateus <i>et al.</i> 2013; Kozak <i>et al.</i> 2014                                                                                                                        |
| Regulation of immune cell proliferation               | SAM and SH3 domain-containing protein                                                                                                                                                                                                                                                                           | Kozak <i>et al.</i> 2014; Guo <i>et al.</i> 2015                                                                                                                                                       |
| Regulator of fatty acid uptake, intracellular binding | Peroxisome proliferator-activated receptor alpha a, Fatty acid-binding protein, adipocyte (AFABP)                                                                                                                                                                                                               | Mavarez <i>et al.</i> 2009; Morris <i>et al.</i> 2014                                                                                                                                                  |
| Tight junction                                        | Claudin 1, 3, 4, 7, 8, 10, 15                                                                                                                                                                                                                                                                                   | Kozak <i>et al.</i> 2014; Dennenmoser <i>et al.</i> 2017; Kusakabe <i>et al.</i> 2017; Velotta <i>et al.</i> 2017                                                                                      |
| Water transport                                       | Aquaporin 3                                                                                                                                                                                                                                                                                                     | Velotta <i>et al.</i> 2017                                                                                                                                                                             |

## References

- Acolas, M.L., Lambert, P., 2016. Life histories of anadromous fishes, in: Morais, P., Daverat, F. (Eds.), *An Introduction to Fish Migration*. pp. 66–67.
- Acolas, M.L., Rochard, E., Le Pichon, C., Rouleau, E., 2012. Downstream migration patterns of one-year-old hatchery-reared European sturgeon (*Acipenser sturio*). *J. Exp. Mar. Bio. Ecol.* 430–431, 68–77. <https://doi.org/10.1016/j.jembe.2012.06.026>
- Ahmed, Q., Bat, L., 2016. Levels and Health Risk Assessments of Cd and Pb in *Pomadasys maculatus* Marketed by Karachi Fish Harbor, Pakistan. *ILMU Kelaut. Indones. J. Mar. Sci.* 21, 53. <https://doi.org/10.14710/ik.ijms.21.2.53-58>
- Albieri, R.J., Araújo, F.G., Ribeiro, T.P., 2010. Gonadal development and spawning season of white mullet *Mugil curema* (Mugilidae) in a tropical bay: Short communication. *J. Appl. Ichthyol.* 26, 105–109. <https://doi.org/10.1111/j.1439-0426.2009.01369.x>
- Allen, P.J., Cech, J.J., Kültz, D., 2009. Mechanisms of seawater acclimation in a primitive, anadromous fish, the green sturgeon. *J. Comp. Physiol. B Biochem. Syst. Environ. Physiol.* 179, 903–920. <https://doi.org/10.1007/s00360-009-0372-2>
- Allen, P.J., Mitchell, Z.A., Devries, R.J., Aboagye, D.L., Ciaramella, M.A., Ramee, S.W., Stewart, H.A., Shartau, R.B., 2014. Salinity effects on Atlantic sturgeon (*Acipenser oxyrinchus oxyrinchus* Mitchill, 1815) growth and osmoregulation. *J. Appl. Ichthyol.* 30, 1229–1236. <https://doi.org/10.1111/jai.12542>
- Almeida, P.R., 1996. Estuarine movement patterns of adult thin-lipped grey mullet, *Liza ramada* (Risso) (Pisces, Mugilidae), observed by ultrasonic tracking. *J. Exp. Mar. Bio. Ecol.* 202, 137–150.
- Alò, D., Correa, C., Samaniego, H., Krabbenhoft, C.A., Turner, T.F., 2019. Otolith microchemistry and diadromy in Patagonian river fishes. *PeerJ* 2019, 1–25. <https://doi.org/10.7717/peerj.6149>
- Aprahamian, M.W., Baglinière, J.L., Sabatié, M.R., Alexandrino, P., Thiel, R., Aprahamian, C.D., 2003. Biology, status, and conservation of the anadromous Atlantic twaite shad *Alosa fallax fallax*. *Am. Fish. Soc. Symp.* 2003, 103–124.
- Arai, T., 2006. Comparison of habitat use during early life stage between ayu *Plecoglossus altivelis* and ice goby *Leucopsarion petersi* along the Sanriku Coast of Japan, as determined from otolith microchemistry. *Fish. Sci.* 72, 382–387. <https://doi.org/10.1111/j.1444-2906.2006.01160.x>
- Arai, T., Chino, N., 2019. Variations in the migratory history of the tropical catadromous eels *Anguilla bicolor bicolor* and *A. bicolor pacifica* in south-east Asian waters. *J. Fish Biol.* 94, 752–758. <https://doi.org/10.1111/jfb.13952>
- Arai, T., Chino, N., 2012. Diverse migration strategy between freshwater and seawater habitats in the freshwater eel genus *Anguilla*. *J. Fish Biol.* 81, 442–455. <https://doi.org/10.1111/j.1095-8649.2012.03353.x>
- Arai, T., Chino, N., Le, D.Q., 2013. Migration and habitat use of the tropical eels *Anguilla marmorata* and *A. bicolor pacifica* in Vietnam. *Aquat. Ecol.* 47, 57–65. <https://doi.org/10.1007/s10452-012-9424-x>
- Arai, T., Goto, A., 2008. Diverse migratory histories in a brackish water type of the ninespine stickleback, *Pungitius pungitius*. *Environ. Biol. Fishes* 83, 349–353. <https://doi.org/10.1007/s10641-008-9349-3>
- Arai, T., Goto, A., Miyazaki, N., 2003. Use of otolith microchemistry to estimate the migratory history of the threespine stickleback, *Gasterosteus aculeatus*. *J. Mar. Biol. Assoc. United Kingdom* 83, 223–230. <https://doi.org/10.1017/s0025315403007008h>

- Arai, T., Kotake, A., McCarthy, T.K., 2006. Habitat use by the European eel *Anguilla anguilla* in Irish waters. *Estuar. Coast. Shelf Sci.* 67, 569–578. <https://doi.org/10.1016/j.ecss.2006.01.001>
- Arai, T., Miyazaki, N., 2001. Use of otolith microchemistry to estimate the migratory history of the Russian sturgeon, *Acipenser guldenstadti*. *J. Mar. Biol. Assoc. United Kingdom* 81, 709–710. <https://doi.org/10.1017/S0025315401004465>
- Arai, T., Taha, H., Amalina, R., Iizuka, Y., Chang, C.W., 2019. Anadromy and heterogenous population of a tropical shad *Tenualosa ilisha* in Malaysia, as revealed by otolith microchemistry and molecular evidence. *J. Fish Biol.* 95, 1506–1511. <https://doi.org/10.1111/jfb.14154>
- Augspurger, J.M., Warburton, M., Closs, G.P., 2017. Life-history plasticity in amphidromous and catadromous fishes: a continuum of strategies. *Rev. Fish Biol. Fish.* 27, 177–192. <https://doi.org/10.1007/s11160-016-9463-9>
- Austin, C.S., Bond, M.H., Smith, J.M., Lowery, E.D., Quinn, T.P., 2019. Otolith microchemistry reveals partial migration and life history variation in a facultatively anadromous, iteroparous salmonid, bull trout (*Salvelinus confluentus*). *Environ. Biol. Fishes* 102, 95–104. <https://doi.org/10.1007/s10641-019-0848-1>
- Avigliano, E., Carvalho, B., Velasco, G., Tripodi, P., Vianna, M., Volpedo, A.V., 2017. Nursery areas and connectivity of the adults anadromous catfish (*Genidens barbatus*) revealed by otolith-core microchemistry in the south-western Atlantic Ocean. *Mar. Freshw. Res.* 68, 931–940. <https://doi.org/10.1071/MF16058>
- Azevedo, M.F.C., Oliveira, C., Pardo, B.G., Martínez, P., Foresti, F., 2008. Phylogenetic analysis of the order Pleuronectiformes (Teleostei) based on sequences of 12S and 16S mitochondrial genes. *Genet. Mol. Biol.* 31, 284–292. <https://doi.org/10.1590/s1415-47572008000200023>
- Baglinière, J.L., Sabatié, M.R., Rochard, E., Alexandrino, P., Arahamian, M.W., 2003. The allis shad *Alosa alosa*: Biology, ecology, range, and status of populations. *Am. Fish. Soc. Symp.* 2003, 85–102.
- Bartels, H., Wrede, C., Przybylski, M., Potter, I.C., Docker, M.F., 2017. Implications of absence of seawater-type mitochondria-rich cells and results of molecular analyses for derivation of the non-parasitic Ukrainian brook lamprey *Eudontomyzon mariae*. *Environ. Biol. Fishes* 100, 509–518. <https://doi.org/10.1007/s10641-017-0581-6>
- Beamish, R.J., Levings, C.D., 1991. Abundance and freshwater migrations of the anadromous parasitic lamprey, *Lampetra tridentata*, in a tributary of the Fraser River, British Columbia. *Can. J. Fish. Aquat. Sci.* 48, 1250–1263. <https://doi.org/10.1139/f91-151>
- Bell, K.N.I., Pepin, P., Brown, J.A., 1995. Seasonal, inverse cycling of length- and age-at-recruitment in the diadromous gobies *Sicydium punctatum* and *Sicydium antillarum* in Dominica, West Indies. *Can. J. Fish. Aquat. Sci.* 52, 1535–1545. <https://doi.org/10.1139/f95-147>
- Benson, L.K., Michael Fitzsimons, J., 2002. Life history of the Hawaiian fish *Kuhlia sandvicensis* as inferred from daily growth rings of otoliths. *Environ. Biol. Fishes* 65, 131–137. <https://doi.org/10.1023/A:1020045525086>
- Betancur-R, R., 2010. Molecular phylogenetics supports multiple evolutionary transitions from marine to freshwater habitats in ariid catfishes. *Mol. Phylogenet. Evol.* 55, 249–258. <https://doi.org/10.1016/j.ympev.2009.12.018>
- Bijoy Nandan, S., Jayachandran, P.R., Sreedevi, O.K., 2012. Temporal pattern of fish production in a microtidal tropical estuary in the south-west coast of India. *Indian J. Fish.* 59, 17–26.
- Blaber, S.J.M., Milton, D.A., Brewer, D.T., Salini, J.P., 2003. Biology, fisheries, and status of tropical shads *Tenualosa* spp. in south and southeast Asia. *Am. Fish. Soc. Symp.* 2003, 49–58.

- Bloom, D.D., Lovejoy, N.R., 2014. The evolutionary origins of diadromy inferred from a time-calibrated phylogeny for Clupeiformes (herring and allies). *Proc. R. Soc. B Biol. Sci.* 281, 20132081. <https://doi.org/10.1098/rspb.2013.2081>
- Borcherding, J., Breukelaar, A.W., Winter, H. V., König, U., 2014. Spawning migration and larval drift of anadromous North Sea houting (*Coregonus oxyrinchus*) in the River IJssel, the Netherlands. *Ecol. Freshw. Fish* 23, 161–170. <https://doi.org/10.1111/eff.12058>
- Bradbury, I.R., Campana, S.E., Bentzen, P., 2008. Otolith elemental composition and adult tagging reveal spawning site fidelity and estuarine dependency in rainbow smelt. *Mar. Ecol. Prog. Ser.* 368, 255–268. <https://doi.org/10.3354/meps07583>
- Brennan, R.S., Healy, T.M., Bryant, H.J., La, M. Van, Schulte, P.M., Whitehead, A., 2018. Integrative Population and Physiological Genomics Reveals Mechanisms of Adaptation in Killifish. *Mol. Biol. Evol.* 35, 2639–2653. <https://doi.org/10.1093/molbev/msy154>
- Brown, R.J., Daum, D.W., Zuray, S.J., Carter, W.K., 2008. Documentation of annual spawning migrations of anadromous coregonid fishes in a large river using maturity indices, length and age analyses, and CPUE. *Adv. Limnol.* 63, 101–116. <https://doi.org/10.1127/advlim/63/2012/101>
- Campanella, D., Hughes, L.C., Unmack, P.J., Bloom, D.D., Piller, K.R., Ortí, G., 2015. Multi-locus fossil-calibrated phylogeny of Atheriniformes (Teleostei, Ovalentaria). *Mol. Phylogenet. Evol.* 86, 8–23. <https://doi.org/10.1016/j.ympev.2015.03.001>
- Chabbarria, R., Furiness, S., Patterson, L., Hall, J., Chen, Y., Lynch, B., Pezold, F., 2014. Genetic Structure and Demographic History of Endemic Micronesian Blue Riffle Goby, *Stiphodon caeruleus* (Gobiidae) Inferred from Mitochondrial DNA Sequence Analysis. *Copeia* 2014, 23–37. <https://doi.org/10.1643/ci-12-150>
- Chang, C.W., Iizuka, Y., 2012. Estuarine use and movement patterns of seven sympatric Mugilidae fishes: The Tatu Creek estuary, central western Taiwan. *Estuar. Coast. Shelf Sci.* 106, 121–126. <https://doi.org/10.1016/j.ecss.2012.04.023>
- Chen, W.J., Lavoué, S., Mayden, R.L., 2013. Evolutionary Origin And Early Biogeography Of Otophysan Fishes (Ostariophysi: Teleostei). *Evolution* (N. Y.). 67, 2218–2239. <https://doi.org/10.1111/evo.12104>
- Chenoweth, S.F., Hughes, J.M., 1997. Genetic population structure of the catadromous perciform: *Macquaria novemaculeata* (Percichthyidae). *J. Fish Biol.* 50, 721–733. <https://doi.org/10.1006/jfbi.1996.0336>
- Clarke, A.D., Lewis, A., Telmer, K.H., Shrimpton, J.M., 2007. Life history and age at maturity of an anadromous smelt, the eulachon *Thaleichthys pacificus* (Richardson). *J. Fish Biol.* 71, 1479–1493. <https://doi.org/10.1111/j.1095-8649.2007.01618.x>
- Clemens, B.J., van de Wetering, S., Sower, S.A., Schreck, C.B., 2013. Maturation characteristics and life-history strategies of the Pacific lamprey, *Entosphenus tridentatus*. *Can. J. Zool.* 91, 775–778. <https://doi.org/10.1139/cjz-2013-0114>
- Como, S., Carpentier, A., Rossi, F., Dupuy, C., Richard, P., Feunteun, E., Lefrançois, C., 2018. Stable isotopes as tracers can reveal resource allocation in juvenile golden gray mullets (*Liza aurata*, Risso, 1810). *J. Exp. Mar. Bio. Ecol.* 503, 72–79. <https://doi.org/10.1016/j.jembe.2018.01.009>
- Corush, J.B., 2019. Evolutionary patterns of diadromy in fishes: more than a transitional state between marine and freshwater. *BMC Evol. Biol.* 19, 168. <https://doi.org/10.1186/s12862-019-1492-2>
- Couillard, M.A., Cabana, G., Dery, J.F., Daigle, G., Dodson, J.J., 2011. Ontogenetic Habitat Shifts of the Atlantic Tomcod (*Microgadus tomcod*) Across an Estuarine Transition Zone. *Estuaries and Coasts* 34, 1234–1245. <https://doi.org/10.1007/s12237-011-9428-0>

- Crook, D.A., Koster, W.M., Macdonald, J.I., Nicol, S.J., Belcher, C.A., Dawson, D.R., O'mahony, D.J., Lovett, D., Walker, A., Bannam, L., 2010. Catadromous migrations by female tupoong (*Pseudaphritis urvillii*) in coastal streams in VICTORIA, Australia. *Mar. Freshw. Res.* 61, 474–483. <https://doi.org/10.1071/MF09170>
- Davis, A.M., Unmack, P.J., Pusey, B.J., Johnson, J.B., Pearson, R.G., 2012. Marine-freshwater transitions are associated with the evolution of dietary diversification in terapontid grunters (Teleostei: Terapontidae). *J. Evol. Biol.* 25, 1163–1179. <https://doi.org/10.1111/j.1420-9101.2012.02504.x>
- Debiasse, M.B., Kawji, Y., Kelly, M.W., 2018. Phenotypic and transcriptomic responses to salinity stress across genetically and geographically divergent *Tigriopus californicus* populations. *Mol. Ecol.* 27, 1621–1632. <https://doi.org/10.1111/mec.14547>
- Delgado, M.L., Górski, K., Habit, E., Ruzzante, D.E., 2019. The effects of diadromy and its loss on genomic divergence: The case of amphidromous *Galaxias maculatus* populations. *Mol. Ecol.* 28, 5217–5231. <https://doi.org/10.1111/mec.15290>
- Dennenmoser, S., Vamosi, S.M., Nolte, A.W., Rogers, S.M., 2017. Adaptive genomic divergence under high gene flow between freshwater and brackish-water ecotypes of prickly sculpin (*Cottus asper*) revealed by Pool-Seq. *Mol. Ecol.* 26, 25–42. <https://doi.org/10.1111/mec.13805>
- Dickman, M., 1995. An isolated population of fourhorn sculpins (*Myoxocephalus quadricornis*, family Cottidae) in a hypersaline high arctic Canadian lake. *Hydrobiologia* 312, 27–35. <https://doi.org/10.1007/BF00018884>
- Dodson, J.J., Aubin-Horth, N., Thériault, V., Páez, D.J., 2013. The evolutionary ecology of alternative migratory tactics in salmonid fishes. *Biol. Rev.* 88, 602–625. <https://doi.org/10.1111/brv.12019>
- Dodson, J.J., Laroche, J., Lecomte, F., 2009. Contrasting evolutionary pathways of anadromy in euteleostean fishes. *Am. Fish. Soc. Symp.* 69, 63–77.
- Donaldson, T.J., Myers, R.F., 2002. Insular freshwater fish faunas of Micronesia: Patterns of species richness and similarity. *Environ. Biol. Fishes* 65, 139–149. <https://doi.org/10.1023/A:1020050931158>
- Dou, S.Z., Yokouchi, K., Yu, X., Cao, L., Kuroki, M., Otake, T., Tsukamoto, K., 2012. The migratory history of anadromous and non-anadromous tapertail anchovy *Coilia nasus* in the Yangtze River Estuary revealed by the otolith Sr:Ca ratio. *Environ. Biol. Fishes* 95, 481–490. <https://doi.org/10.1007/s10641-012-0042-1>
- Duan, J., Zhang, H., Liu, K., Xu, D., Zhang, M., Shi, W., 2012. An overview of *Coilia ectenes* in Jiangsu Section of the Yangtze River. *Agric. Sci. Technol.* 13, 1950–1954.
- Ebner, B.C., Donaldson, J.A., Allen, G.R., Keith, P., 2017. Visual census, photographic records and the trial of a video network provide first evidence of the elusive *Sicyopterus cynocephalus* in Australia. *Cybium* 41, 117–125.
- Ebner, B.C., Thuesen, P., 2011. Discovery of stream-cling-goby assemblages (*Stiphodon* species) in the Australian Wet Tropics. *Aust. J. Zool.* 58, 331–340.
- Edo, K., Kawaguchi, Y., Nunokawa, M., Kawamura, H., Higashi, S., 2005. Morphology, stomach contents and growth of the endangered salmonid, Sakhalin taimen *Hucho perryi*, captured in the Sea of Okhotsk, northern Japan: Evidence of an anadromous form. *Environ. Biol. Fishes* 74, 1–7. <https://doi.org/10.1007/s10641-004-6115-z>
- Elahi, N., Yousuf, F., Tabassum, S., Hossain, M., Hossen, M., Nawar, F., Bahkali, A., El-Shikh, M., Elgorban, A., Rahman, M., 2017. Life-history Traits of the Blacktrip sardinella, *Sardinella melanura* (Clupeidae) in the Gwadar, Balochistan Coast, Pakistan. *Indian J. Geo-Marine Sci.* 46, 397–404.
- Feutry, P., Castelin, M., Ovenden, J.R., Dettai, A., Robinet, T., Cruaud, C., Keith, P., 2013. Evolution of

- diadromy in fish: insights from a tropical genus (*Kuhlia* species). *Am. Nat.* 181, 52–63.  
<https://doi.org/10.1086/668593>
- Filipe, A.F., Araújo, M.B., Doadrio, I., Angermeier, P.L., Collares-Pereira, M.J., 2009. Biogeography of Iberian freshwater fishes revisited: The roles of historical versus contemporary constraints. *J. Biogeogr.* 36, 2096–2110. <https://doi.org/10.1111/j.1365-2699.2009.02154.x>
- Flura, -, Alam, M.A., Hossain, M.R.A., 2018. A review on *Silonia silondia* (Hamilton, 1822) threatened fish of the world: (Siluriformes: Schilbeidae). *Res. Agric. Livest. Fish.* 5, 235–240.  
<https://doi.org/10.3329/ralf.v5i2.38113>
- Franklin, P., Gee, E., 2019. Living in an amphidromous world: Perspectives on the management of fish passage from an island nation. *Aquat. Conserv. Mar. Freshw. Ecosyst.* 29, 1424–1437.  
<https://doi.org/10.1002/aqc.3049>
- Frotté, L., Ringelstein, J., Monti, D., Robert, M., Pécheyran, C., Améziane, N., Tabouret, H., 2019. Detection of full and limited amphidromous migratory dynamics of fish in Caribbean rivers. *Ecol. Freshw. Fish* eff.12501. <https://doi.org/10.1111/eff.12501>
- Fuji, T., Kasai, A., Yamashita, Y., 2018. Upstream migration mechanisms of juvenile temperate sea bass *Lateolabrax japonicus* in the stratified Yura River estuary. *Fish. Sci.* 84, 163–172.  
<https://doi.org/10.1007/s12562-017-1167-0>
- Gallagher, Z.S., Bystriansky, J.S., Farrell, A.P., Brauner, C.J., 2013. A novel pattern of smoltification in the most anadromous salmonid: Pink salmon (*Oncorhynchus gorbuscha*). *Can. J. Fish. Aquat. Sci.* 70, 349–357. <https://doi.org/10.1139/cjfas-2012-0390>
- Garbin, T., Castello, J.P., Kinas, P.G., 2014. Age, growth, and mortality of the mullet *Mugil liza* in Brazil's southern and southeastern coastal regions. *Fish. Res.* 149, 61–68.  
<https://doi.org/10.1016/j.fishres.2013.09.008>
- González-Murcia, S., Álvarez, F.S., 2018. Your place, my place..., distribution of *Agonostomus monticola* and *Sicydium multipunctatum* in the Acahuapa Watershed. *Rev. Mex. Biodivers.* 89, 854–864.  
<https://doi.org/10.22201/ib.20078706e.2018.3.2244>
- Gordoa, A., 2009. Characterization of the infralittoral system along the north-east Spanish coast based on sport shore-based fishing tournament catches. *Estuar. Coast. Shelf Sci.* 82, 41–49.  
<https://doi.org/10.1016/j.ecss.2008.11.024>
- Goto, A., Arai, T., 2003. Migratory histories of three types of *Cottus pollux* (small-egg, middle-egg, and large-egg types) as revealed by otolith microchemistry. *Ichthyol. Res.* 50, 67–72.  
<https://doi.org/10.1007/s102280300009>
- Guo, B., DeFaveri, J., Sotelo, G., Nair, A., Merilä, J., 2015. Population genomic evidence for adaptive differentiation in Baltic Sea three-spined sticklebacks. *BMC Biol.* 13, 19. <https://doi.org/10.1186/s12915-015-0130-8>
- Hale, M.C., Thrower, F.P., Berntson, E.A., Miller, M.R., Nichols, K.M., 2013. Evaluating adaptive divergence between migratory and nonmigratory ecotypes of a salmonid fish, *Oncorhynchus mykiss*. *G3 Genes, Genomes, Genet.* 3, 1273–1285. <https://doi.org/10.1534/g3.113.006817>
- Hashemi, S.A., Taghavimotlagh, S.A., Hedayati, A., Ghorbani, R., 2013. Original article Some biological aspect of thinspine seacatfish ( *plicofollis tenuispinis* ) in northwest of persian gulf ( Khuzestan coastal waters , Iran ) 2, 176–183. <https://doi.org/10.14196/sjbs.v2i8.857>
- Heim-Ballew, H., Moody, K.N., Blum, M.J., McIntyre, P.B., Hogan, J.D., 2020. Migratory flexibility in native Hawai'ian amphidromous fishes. *J. Fish Biol.* 96, 456–468. <https://doi.org/10.1111/jfb.14224>

- Hickford, M.J.H., Schiel, D.R., 2016. Otolith microchemistry of the amphidromous *Galaxias maculatus* shows recruitment to coastal rivers from unstructured larval pools. *Mar. Ecol. Prog. Ser.* 548, 197–207. <https://doi.org/10.3354/meps11701>
- Hogan, J.D., Kozdon, R., Blum, M.J., Gilliam, J.F., Valley, J.W., McIntyre, P.B., 2017. Reconstructing larval growth and habitat use in an amphidromous goby using otolith increments and microchemistry. *J. Fish Biol.* 90, 1338–1355. <https://doi.org/10.1111/jfb.13240>
- Hogan, Z., Baird, I.G., Radtke, R., Vander Zanden, M.J., 2007. Long distance migration and marine habitation in the tropical Asian catfish, *Pangasius krempfi*. *J. Fish Biol.* 71, 818–832. <https://doi.org/10.1111/j.1095-8649.2007.01549.x>
- Honț, Ștefan, Paraschiv, M., Ion Iani, M., Taflan, E., Holostenco, D.N., Oprea, D., Oprea, L., 2019. Detailed analysis of beluga sturgeon (*Huso huso*) and stellate sturgeon (*Acipenser stellatus*) migration in the Lower Danube River. *Turkish J. Zool.* 43, 457–464. <https://doi.org/10.3906/zoo-1902-32>
- Iguchi, K., Mizuno, N., 1999. Early starvation limits survival in amphidromous fishes. *J. Fish Biol.* 54, 705–712. <https://doi.org/10.1006/jfbi.1998.0909>
- Iida, M., Kondo, M., Tabouret, H., Maeda, K., Pécheyran, C., Hagiwara, A., Keith, P., Tachihara, K., 2017. Specific gravity and migratory patterns of amphidromous gobioid fish from Okinawa Island, Japan. *J. Exp. Mar. Bio. Ecol.* 486, 160–169. <https://doi.org/10.1016/j.jembe.2016.09.011>
- Imoto, J.M., Saitoh, K., Sasaki, T., Yonezawa, T., Adachi, J., Kartavtsev, Y.P., Miya, M., Nishida, M., Hanzawa, N., 2013. Phylogeny and biogeography of highly diverged freshwater fish species (Leuciscinae, Cyprinidae, Teleostei) inferred from mitochondrial genome analysis. *Gene* 514, 112–124. <https://doi.org/10.1016/j.gene.2012.10.019>
- Ishihara, T., Tachihara, K., 2008. Reproduction and early development of a freshwater pipefish *Microphis leiaspis* in Okinawa-jima Island, Japan. *Ichthyol. Res.* 55, 349–355. <https://doi.org/10.1007/s10228-008-0049-y>
- Jarvis, M.G., Harland, H.A., Warburton, M.L., Closs, G.P., 2018. The spawning and early life-history of a New Zealand endemic amphidromous eleotrid, bluegill bully (*Gobiomorphus hubbsi*). *New Zeal. J. Mar. Freshw. Res.* 52, 55–68. <https://doi.org/10.1080/00288330.2017.1330760>
- Jeong, S.Y., Kim, J.H., Lee, W.O., Dahms, H.U., Han, K.N., 2014. Salinity changes in the anadromous river pufferfish, *Takifugu obscurus*, mediate gene regulation. *Fish Physiol. Biochem.* 40, 205–219. <https://doi.org/10.1007/s10695-013-9837-z>
- Jessop, B.M., Cairns, D.K., Thibault, I., Tzeng, W.N., 2007. Life history of American eel *Anguilla rostrata*: New insights from otolith microchemistry. *Aquat. Biol.* 1, 205–216. <https://doi.org/10.3354/ab00018>
- Katayama, S., Radtke, R.L., Omori, M., Shafer, D.J., 2000. Coexistence of anadromous and resident life history styles of pond smelt, *Hypomesus nipponensis*, in Lake Ogawara, Japan, as determined by analyses of otolith structure and strontium: Calcium ratios. *Environ. Biol. Fishes* 58, 195–201. <https://doi.org/10.1023/A:1007682729460>
- Keith, P., 2003. Biology and ecology of amphidromous Gobiidae of the Indo-Pacific and the Caribbean regions. *J. Fish Biol.* 63, 831–847. <https://doi.org/10.1046/j.1095-8649.2003.00197.x>
- Kissinger, B.C., Gantner, N., Anderson, W.G., Gillis, D.M., Halden, N.M., Harwood, L.A., Reist, J.D., 2016. Brackish-water residency and semi-anadromy in Arctic lake trout (*Salvelinus namaycush*) inferred from otolith microchemistry. *J. Great Lakes Res.* 42, 267–275. <https://doi.org/10.1016/j.jglr.2015.05.016>
- Kohestan-Eskandari, S., Anvarifar, H., Mousavi-Sabet, H., Yousefi, M., Khanzade, M., 2014. A morphology-based hypothesis for homeward migration success and population differentiation in the anadromous kutum

- Rutilus kutum (Pisces: Cyprinidae) along the southern Caspian Sea, Iran. *Folia Zool.* 63, 151–160. <https://doi.org/10.25225/fozo.v63.i3.a2.2014>
- Kokita, T., Nohara, K., 2011. Phylogeography and historical demography of the anadromous fish *Leucopsarion petersii* in relation to geological history and oceanography around the Japanese Archipelago. *Mol. Ecol.* 20, 143–164. <https://doi.org/10.1111/j.1365-294X.2010.04920.x>
- Koshelev, V.N., Mikodina, E. V., Mironova, T.N., Presnyakov, A. V., Novosadov, A.G., 2012. New data on biology and distribution of Sakhalin sturgeon *Acipenser mikadoi*. *J. Ichthyol.* 52, 619–627. <https://doi.org/10.1134/S0032945212050025>
- Koshelev, V.N., Ruban, G., Shmigirilov, A., 2014. Spawning migrations and reproductive parameters of the kaluga sturgeon, *Huso dauricus* (Georgi, 1775), and Amur sturgeon, *Acipenser schrenckii* (Brandt, 1869). *J. Appl. Ichthyol.* 30, 1125–1132. <https://doi.org/10.1111/jai.12549>
- Kozak, G.M., Brennan, R.S., Berdan, E.L., Fuller, R.C., Whitehead, A., 2014. Functional and population genomic divergence within and between two species of killifish adapted to different osmotic niches. *Evolution* (N. Y). 68, 63–80. <https://doi.org/10.1111/evo.12265>
- Kusakabe, M., Ishikawa, A., Ravinet, M., Yoshida, K., Makino, T., Toyoda, A., Fujiyama, A., Kitano, J., 2017. Genetic basis for variation in salinity tolerance between stickleback ecotypes. *Mol. Ecol.* 26, 304–319. <https://doi.org/10.1111/mec.13875>
- Kuzishchin, K. V., Gruzdeva, M.A., Filenko, V.A., Pavlov, D.S., 2020. Caspian Anadromous Shad *Alosa kessleri kessleri* (Grimm, 1887) from the Akhtuba River, Lower Volga River Basin: Biological and Morphological Features. *Int. Water Biol.* 13, 79–87. <https://doi.org/10.1134/S1995082920010125>
- Kynard, B., 1997. Life history, latitudinal patterns, and status of the shortnose sturgeon, *Acipenser brevirostrum*. *Environ. Biol. Fishes* 48, 319–334. <https://doi.org/10.1023/a:1007372913578>
- Kynard, B., Zhuang, P., Zhang, T., Zhang, L., 2003. Ontogenetic behavior and migration of Dabry's sturgeon, *Acipenser dabryanus*, from the Yangtze River, with notes on body color and development rate. *Environ. Biol. Fishes* 66, 27–36. <https://doi.org/10.1023/A:1023238117045>
- Lehtonen, H., Nyberg, K., Vuoronen, P.J., Leskelä, A., 1992. Radioactive strontium (<sup>85</sup>Sr) in marking whitefish [*Coregonus lavaretus* (L.)] larvae and the dispersal of larvae from river to sea. *J. Fish Biol.* 41, 417–423. <https://doi.org/10.1111/j.1095-8649.1992.tb02670.x>
- Limburg, K.E., 2001. Otolith microchemistry indicates unexpected patterns of residency and anadromy in blueback herring, *alosa aestivalis*, in the hudson and mohawk rivers. *BFPP - Bull. Fr. la Pech. la Prot. des Milieux Aquat.* 931–938. <https://doi.org/10.1051/kmae:2001028>
- Lowerre-Barbieri, S., Villegas-Rís, D., Walters, S., Bickford, J., Cooper, W., Muller, R., Trotter, A., 2014. Spawning site selection and contingent behavior in common snook, *Centropomus undecimalis*. *PLoS One* 9. <https://doi.org/10.1371/journal.pone.0101809>
- Łuszczek-Trojnar, E., Drąg-Kozak, E., Kleszcz, M., Popek, W., Epler, P., 2008. Gonadal maturity in vimba (*Vimba vimba* L.) raised in carp ponds. *J. Appl. Ichthyol.* 24, 316–320. <https://doi.org/10.1111/j.1439-0426.2008.01057.x>
- Lyle, A.A., Maitland, P.S., 1997. The spawning migration and conservation of smelt *Osmerus eperlanus* in the River Cree, Southwest Scotland. *Biol. Conserv.* 80, 303–311. [https://doi.org/10.1016/S0006-3207\(96\)00039-0](https://doi.org/10.1016/S0006-3207(96)00039-0)
- Lyons, J., Schneider, D.W., 1990. Factors influencing fish distribution and community structure in a small coastal river in southwestern Costa Rica. *Hydrobiologia* 203, 1–14. <https://doi.org/10.1007/BF00005608>



- Maeda, K., 2014. *Stiphodon niraikanaiensis*, a new species of sicydiine goby from Okinawa Island (Gobiidae: Sicydiinae). *Ichthyol. Res.* 61, 99–107. <https://doi.org/10.1007/s10228-013-0379-2>
- Maeda, K., Mukai, T., Tachihara, K., 2011. A new species of amphidromous goby, *Stiphodon alcedo*, from the ryukyu archipelago (Gobiidae: Sicydiinae). *Cybium* 35, 285–298.
- Maeda, K., Tachihara, K., 2005. Recruitment of amphidromous sleepers *Eleotris acanthopoma*, *Eleotris melanosoma*, and *Eleotris fusca* into the Teima River, Okinawa Island. *Ichthyol. Res.* 52, 325–335. <https://doi.org/10.1007/s10228-005-0289-z>
- Mai, A.C.G., dos Santos, M.L., Lemos, V.M., Vieira, J.P., 2018. Discrimination of habitat use between two sympatric species of mullets, *Mugil curema* and *Mugil liza* (Mugiliformes: Mugilidae) in the rio Tramandaí Estuary, determined by otolith chemistry. *Neotrop. Ichthyol.* 16, 1–8. <https://doi.org/10.1590/1982-0224-20170045>
- Mai, A.C.G., Vieira, J.P., 2013. Revisão e considerações sobre o uso do habitat, distribuição e história de vida de *Lycengraulis grossidens* (Agassiz, 1829) (Actinopterygii, Clupeiformes, Engraulididae). *Biota Neotrop.* 13, 121–130. <https://doi.org/10.1590/S1676-06032013000300015>
- Mark Shrimpton, J., 2012. *Seawater to Freshwater Transitions in Diadromous Fishes*, Fish Physiology. Elsevier Inc. <https://doi.org/10.1016/B978-0-12-396951-4.00007-4>
- Martin, T.J., 1990. Osmoregulation in three species of Ambassidae (Osteichthyes: Perciformes) from estuaries in Natal. *South African J. Zool.* 25, 229–234. <https://doi.org/10.1080/02541858.1990.11448217>
- Martínez-Álvarez, R.M., Sanz, A., García-Gallego, M., Domezain, A., Domezain, J., Carmona, R., Del Valle Ostos-Garrido, M., Morales, A.E., 2005. Adaptive branchial mechanisms in the sturgeon *Acipenser naccarii* during acclimation to saltwater. *Comp. Biochem. Physiol. - A Mol. Integr. Physiol.* 141, 183–190. <https://doi.org/10.1016/j.cbpb.2005.05.003>
- Mateus, C.S., Stange, M., Berner, D., Roesti, M., Quintella, B.R., Alves, M.J., Almeida, P.R., Salzburger, W., 2013. Strong genome-wide divergence between sympatric European river and brook lampreys. *Curr. Biol.* 23, R649–R650. <https://doi.org/10.1016/j.cub.2013.06.026>
- Mavarez, J., Audet, C., Bernatchez, L., 2009. Major disruption of gene expression in hybrids between young sympatric anadromous and resident populations of brook charr (*Salvelinus fontinalis* Mitchill). *J. Evol. Biol.* 22, 1708–1720. <https://doi.org/10.1111/j.1420-9101.2009.01785.x>
- McBride, R.S., Holder, J.C., 2008. A Review and Updated Assessment of Florida's Anadromous Shads: American Shad and Hickory Shad. *North Am. J. Fish. Manag.* 28, 1668–1686. <https://doi.org/10.1577/m07-066.1>
- McBride, R.S., Matheson, R.E., 2011. FLORIDA ' S DIADROMOUS FISHES : BIOLOGY , ECOLOGY , CONSERVATION , AND MANAGEMENT. *Florida Sci.* 74, 187–213.
- McDowall, R., 2010. Why be amphidromous : expatrial dispersal and the place of source and sink population dynamics ? *Rev. Fish Biol. Fish.* 20, 87–100. <https://doi.org/10.1007/s11160-009-9125-2>
- McDowall, R., 2004. Ancestry and amphidromy in island freshwater fish faunas. *Fish Fish.* 5, 75–85. <https://doi.org/10.1111/j.1467-2960.2004.00138.x>
- McDowall, R., 1999. Different kinds of diadromy: Different kinds of conservation problems. *ICES J. Mar. Sci.* 56, 410–413. <https://doi.org/10.1006/jmsc.1999.0450>
- McDowall, R., 1997. The evolution of diadromy in fishes (revisited) and its place in phylogenetic analysis. *Rev. Fish Biol. Fish.* 7, 443–462. <https://doi.org/10.1023/A:1018404331601>

- McDowall, R.M., 2009. Early hatch: A strategy for safe downstream larval transport in amphidromous gobies. *Rev. Fish Biol. Fish.* 19, 1–8. <https://doi.org/10.1007/s11160-008-9085-y>
- McDowall, R.M., 2000. Biogeography of the New Zealand torrentfish, *Cheimarrichthys fosteri* (Teleostei: Pinguipedidae): A distribution driven mostly by ecology and behaviour. *Environ. Biol. Fishes* 58, 119–131. <https://doi.org/10.1023/A:1007666014842>
- McEnroe, M., Cech, J.J., 1985. Osmoregulation in juvenile and adult white sturgeon, *Acipenser transmontanus*. *Environ. Biol. Fishes* 14, 23–30. <https://doi.org/10.1007/BF00001573>
- Mennesson, M.I., Tabouret, H., Pécheyrans, C., Feunteun, E., Keith, P., 2015. Amphidromous life cycle of *Eleotris fusca* (Gobioidei: Eleotridae), a widespread species from the Indo-Pacific studied by otolith analyses. *Cybium* 39, 249–260.
- Miles, N.G., Butler, G.L., Diamond, S.L., Bishop, D.P., van der Meulen, D.E., Reinfelds, I., Walsh, C.T., 2018. Combining otolith chemistry and telemetry to assess diadromous migration in pinkeye mullet, *Trachystoma petardi* (Actinopterygii, Mugiliformes). *Hydrobiologia* 808, 265–281. <https://doi.org/10.1007/s10750-017-3430-x>
- Miles, N.G., Walsh, C.T., Butler, G., Ueda, H., West, R.J., 2014. Australian diadromous fishes - Challenges and solutions for understanding migrations in the 21st century. *Mar. Freshw. Res.* <https://doi.org/10.1071/MF12340>
- Milton, D., 2009. Living in Two Worlds: Diadromous Fishes, and Factors Affecting Populaiton Connectivity Between Tropical Rivers and Coasts, *Ecological Connectivity among Tropical Coastal Ecosystems*.
- Milton, D.A., Chenery, S.R., Farmer, M.J., Blaber, S.J.M., 1997. Identifying the spawning estuaries of the tropical shad, *Terapon taylori*, using otolith microchemistry. *Mar. Ecol. Prog. Ser.* 153, 283–291. <https://doi.org/10.3354/meps153283>
- Miyazaki, Y., Terui, A., 2016. Temporal dynamics of fluvial fish community caused by marine amphidromous species in the Shubuto River, southwestern Hokkaido, Japan. *Ichthyol. Res.* 63, 173–179. <https://doi.org/10.1007/s10228-015-0474-7>
- Morin, R., Dodson, J.J., Power, G., 1982. Life history of anadromous cisco (*Coregonus artedii*), lake whitefish (*Coregonus clupeaformis*), and round whitefish (*Prosopium cylindraceum*) populations of eastern James-Hudson bay. *Can. J. Aquat. Sci.* 39, 958–967.
- Morris, M.R.J., Richard, R., Leder, E.H., Barrett, R.D.H., Aubin-Horth, N., Rogers, S.M., 2014. Gene expression plasticity evolves in response to colonization of freshwater lakes in threespine stickleback. *Mol. Ecol.* 23, 3226–3240. <https://doi.org/10.1111/mec.12820>
- Morris, R., Pickering, A.D., 1976. Changes in the ultrastructure of the gills of the river lamprey, *Lampetra fluviatilis* (L.), during the anadromous spawning migration. *Cell Tissue Res.* 173, 271–277. <https://doi.org/10.1007/BF00221380>
- Murase, I., Iguchi, K., 2019. Facultative amphidromy involving estuaries in an annual amphidromous fish from a subtropical marginal range. *J. Fish Biol.* 95, 1391–1398. <https://doi.org/10.1111/jfb.14147>
- Musarrat-ul-Ain, Farooq, R.Y., Masood, Z., 2015. Gonadosomatic Index of Terapontid species. *Int. J. Biol. Biotechnol.* 12, 575–578.
- Nesbø, C.L., Magnhagen, C., Jakobsen, K.S., 1998. Genetic differentiation among stationary and anadromous perch (*Perca fluviatilis*) in the Baltic Sea. *Hereditas* 129, 241–249. <https://doi.org/10.1111/j.1601-5223.1998.00241.x>
- Nordlie, F.G., 2012. Life-history characteristics of eleotrid fishes of the western hemisphere, and perils of life in

- a vanishing environment. *Rev. Fish Biol. Fish.* 22, 189–224. <https://doi.org/10.1007/s11160-011-9229-3>
- Oto, Y., 2019. Upstream migration without complete osmoregulatory switching in an amphidromous goby: Estimated by body condition changes in different salinity environment. *J. Exp. Mar. Bio. Ecol.* 514–515, 67–75. <https://doi.org/10.1016/j.jembe.2019.03.014>
- Palavai, V., 2009. Diversity and Distribution of Freshwater Fishes of the Andaman.
- Rahman, M.M., Rahman, M., Parvez, S., Mallik, N., Nabi, M.R., 2015. Population dynamics of mudskipper *Periophthalmus novemradiatus* from Bakkhali river estuary, Cox 's Bazar, Bangladesh. *Agric. Sci. Res. J.* 5, 118–123.
- Riede, K., 2004. Global register of migratory species - from global to regional scales. Final Rep. R&D-Projekt 808 05 081. Fed. Agency Nat. Conserv. 329 pp.
- Rodríguez, A., Gallardo, M.A., Gisbert, E., Santilari, S., Ibarz, A., Sánchez, J., Castelló-Orvay, F., 2002. Osmoregulation in juvenile Siberian sturgeon (*Acipenser baerii*). *Fish Physiol. Biochem.* 26, 345–354. <https://doi.org/10.1023/B:FISH.0000009263.83075.68>
- Rohtla, M., Vetemaa, M., Taal, I., Svrigsdén, R., Urtson, K., Saks, L., Verliin, A., Kesler, M., Saat, T., 2014. Life history of anadromous burbot (*Lota lota*, Linnaeus) in the brackish Baltic Sea inferred from otolith microchemistry. *Ecol. Freshw. Fish* 23, 141–148. <https://doi.org/10.1111/eff.12057>
- Sakai, H., Goto, A., Jeon, S.-R., 2002. Speciation and Dispersal of Tribolodon Species (Pisces, Cyprinidae) around the Sea of Japan. *Zoolog. Sci.* 19, 1291–1303. <https://doi.org/10.2108/zsj.19.1291>
- Sakai, H., Imai, C., 2005. Otolith Sr:Ca ratios of the freshwater and anadromous cyprinid genus *Tribolodon*. *Ichthyol. Res.* 52, 182–184. <https://doi.org/10.1007/s10228-004-0264-0>
- Sakar, U.K., Naskar, M., Roy, K., Sudheesan, D., Gupta, S., Bose, A.K., Srivastava, P.K., Nandy, S.K., Verma, V.K., Sarkar, S.D., Karnatak, G., 2018. Baseline information of reproduction parameters of an amphidromous croaker *Johnius coitor* (Hamilton, 1822) from Ganga river basin, India with special reference to potential influence of climatic variability. *Aquat. Living Resour.* 31.
- Samani, N.K., Esa, Y., Amin, S.M.N., Ikhsan, N.F.M., 2016. Phylogenetics and population genetics of *Plotosus canius* (Siluriformes: Plotosidae) from Malaysian coastal waters. *PeerJ* 2016. <https://doi.org/10.7717/peerj.1930>
- Schaffler, J.J., Young, S.P., Herrington, S., Ingram, T., Tannehill, J., 2015. Otolith Chemistry to Determine Within-River Origins of Alabama Shad in the Apalachicola–Chattahoochee–Flint River Basin. *Trans. Am. Fish. Soc.* 144, 1–10. <https://doi.org/10.1080/00028487.2014.954056>
- Schliewen, U.K., 2012. Diversity and Distribution of Marine, Euryhaline and Amphidromous Gobies from Western, Central and Southern Africa, in: Patzner, R.A., Van Tassell, J.L., Kovacic, M., Kapoor, B. (Eds.), *The Biology of Gobies*. pp. 207–229.
- Schmidt, D.J., Crook, D.A., Macdonald, J.I., Huey, J.A., Zampatti, B.P., Chilcott, S., Raadik, T.A., Hughes, J.M., 2014. Migration history and stock structure of two putatively diadromous teleost fishes, as determined by genetic and otolith chemistry analyses. *Freshw. Sci.* 33.
- Secor, D.H., Henderson-Arzapalo, A., Piccoli, P.M., 1995. Can otolith microchemistry chart patterns of migration and habitat utilization in anadromous fishes? *J. Exp. Mar. Bio. Ecol.* 192, 15–33. [https://doi.org/10.1016/0022-0981\(95\)00054-U](https://doi.org/10.1016/0022-0981(95)00054-U)
- Shen, K.N., Lee, Y.C., Tzeng, W.N., 1998. Use of otolith microchemistry to investigate the life history pattern of gobies in a Taiwanese stream. *Zool. Stud.* 37, 322–329.

- Shiao, J.C., Chen, C.Y., Zhang, J., Iizuka, Y., 2016. Habitat use and migratory life history of Salangid icefish (salangidae) revealed by otolith Sr/Ca ratios. *Zool. Stud.* 55, 1–10. <https://doi.org/10.6620/ZS.2016.55-03>
- Shiao, J.C., Tzeng, C.S., Li, P.C., Bell, K.N.I., 2015. Upstream migration and marine early life history of amphidromous gobies inferred from otolith increments and microchemistry. *Environ. Biol. Fishes* 98, 933–950. <https://doi.org/10.1007/s10641-014-0329-5>
- Skovrind, M., Olsen, M.T., Vieira, F.G., Pacheco, G., Carl, H., Gilbert, M.T.P., Møller, P.R., 2016. Genomic population structure of freshwater-resident and anadromous ide (*Leuciscus idus*) in north-western Europe. *Ecol. Evol.* 6, 1064–1074. <https://doi.org/10.1002/ece3.1909>
- Smith, W.E., Kwak, T.J., 2014. Otolith microchemistry of tropical diadromous fishes: Spatial and migratory dynamics. *J. Fish Biol.* 84, 913–928. <https://doi.org/10.1111/jfb.12317>
- Strydom, N.A., 2003. Occurrence of larval and early juvenile fishes in the surf zone adjacent to two intermittently open estuaries, South Africa. *Environ. Biol. Fishes* 66, 349–359. <https://doi.org/10.1023/A:1023949607821>
- Sulak, K.J., Randall, M., 2002. Understanding sturgeon life history: Enigmas, myths, and insights from scientific studies. *J. Appl. Ichthyol.* 18, 519–528. <https://doi.org/10.1046/j.1439-0426.2002.00413.x>
- Tabouret, H., Tomadin, M., Taillebois, L., Iida, M., Lord, C., Pécheyran, C., Keith, P., 2014. Amphidromy and marine larval phase of ancestral gobioids *Rhyacichthys guilberti* and *Protogobius attiti* (Teleostei: Rhyacichthyidae). *Mar. Freshw. Res.* 65, 776–783. <https://doi.org/10.1071/MF13146>
- Taillebois, L., Tabouret, H., Pecheyran, C., Keith, P., 2015. Inputs from microchemistry to the understanding of three Sicydiinae species' life cycle. *Vie Milieu* 65, 73–84.
- Teichert, N., Valade, P., Lim, P., Dauba, F., Labonne, J., Richarson, M., Bosc, P., Gaudin, P., 2014. Habitat selection in amphidromous Gobiidae of Reunion Island: *Sicyopterus lagocephalus* (Pallas, 1770) and *Cotylopus acutipinnis* (Guichenot, 1863). *Environ. Biol. Fishes* 97, 255–266. <https://doi.org/10.1007/s10641-013-0148-0>
- Thacker, C., 2009. Phylogeny of Gobioidae and Placement within Acanthomorpha, with a New Classification and Investigation of Diversification and Character Evolution. *Copeia* 2009, 93–104. <https://doi.org/10.1643/ci-08-004>
- Trancart, T., Lambert, P., Rochard, E., Daverat, F., Coustillas, J., Roqueplo, C., 2012. Alternative flood tide transport tactics in catadromous species: *Anguilla anguilla*, *Liza ramada* and *Platichthys flesus*. *Estuar. Coast. Shelf Sci.* 99, 191–198. <https://doi.org/10.1016/j.ecss.2011.12.032>
- Trevisan dos Santos, J., 2016. Revisão taxonômica e anatomia de *Awaous tajasica* (Lichtenstein, 1822) (Gobiiformes: Gobiidae).
- Tsukamoto, K., Arai, T., 2001. Facultative catadromy of the eel *Anguilla japonica* between freshwater and seawater habitats. *Mar. Ecol. Prog. Ser.* 220, 265–276. <https://doi.org/10.3354/meps220265>
- Tsukamoto, K., Watanabe, S., Kuroki, M., Aoyama, J., Miller, M.J., 2014. Freshwater habitat use by a moray eel species, *Gymnothorax polyuranodon*, in Fiji shown by otolith microchemistry. *Environ. Biol. Fishes* 97, 1377–1385. <https://doi.org/10.1007/s10641-014-0228-9>
- Tsunagawa, T., Arai, T., 2008. Flexible migration of Japanese freshwater gobies *Rhinogobius* spp. as revealed by otolith Sr:Ca ratios. *J. Fish Biol.* 73, 2421–2433. <https://doi.org/10.1111/j.1095-8649.2008.02089.x>
- Tulkani, R., 2017. Population Biology of Two Species of Grey Mullet, *Liza abu* in Central Iraq (Heckel, 1843) and *Chelon labrosus* (Risso, 1827) in North West Wales.

- Vega, G.C., Wiens, J.J., 2012. Why are there so few fish in the sea? *Proc. R. Soc. B Biol. Sci.* 279, 2323–2329. <https://doi.org/10.1098/rspb.2012.0075>
- Velotta, J.P., Wegrzyn, J.L., Ginzburg, S., Kang, L., Czesny, S., Neill, R.J.O., McCormick, S.D., Michalak, P., Schultz, E.T., 2017. Transcriptomic imprints of adaptation to fresh water: parallel evolution of osmoregulatory gene expression in the Alewife. *Mol. Ecol.* 26, 831–848. <https://doi.org/10.1111/mec.13983>
- Villamarín, F., Magnusson, W.E., Jardine, T.D., Valdez, D., Woods, R., Bunn, S.E., 2016. Temporal uncoupling between energy acquisition and allocation to reproduction in a herbivorous-detritivorous fish. *PLoS One* 11, 1–17. <https://doi.org/10.1371/journal.pone.0150082>
- Waldman, J., Grunwald, C., Wirgin, I., 2008. Sea lamprey *Petromyzon marinus*: An exception to the rule of homing in anadromous fishes. *Biol. Lett.* 4, 659–662. <https://doi.org/10.1098/rsbl.2008.0341>
- Walters, A.W., Barnes, R.T., Post, D.M., 2009. Anadromous alewives (*Alosa pseudoharengus*) contribute marine-derived nutrients to coastal stream food webs. *Can. J. Fish. Aquat. Sci.* 66, 439–448. <https://doi.org/10.1139/F09-008>
- Wang, Y., Guo, R., Li, H., Zhang, X., Du, J., Song, Z., 2011. The complete mitochondrial genome of the Sichuan taimen (*Hucho bleekeri*): Repetitive sequences in the control region and phylogenetic implications for Salmonidae. *Mar. Genomics* 4, 221–228. <https://doi.org/10.1016/j.margen.2011.06.003>
- Whitfield, A.K., 2005. Preliminary documentation and assessment of fish diversity in sub-Saharan African estuaries. *African J. Mar. Sci.* 27, 307–324. <https://doi.org/10.2989/18142320509504089>
- Willoughby, J.R., Harder, A.M., Tennesen, J.A., Scribner, K.T., Christie, M.R., 2018. Rapid genetic adaptation to a novel environment despite a genome-wide reduction in genetic diversity. *Mol. Ecol.* 27, 4041–4051. <https://doi.org/10.1111/mec.14726>
- Wilson, J.P.F., 1984. A Review of the Biology of the Pollan *Coregonus autumnalis pollan* Thompson : An Endemic Irish Salmonid Subspecies. *Proc. R. Irish Acad. Sect. B Biol. Geol. Chem. Sci.* 84B, 123–127.
- Wood, C.C., Foote, C.J., 1996. Evidence for sympatric genetic divergence of anadromous and nonanadromous morphs of sockeye salmon (*Oncorhynchus nerka*). *Evolution (N. Y.)* 50, 1265–1279. <https://doi.org/10.1111/j.1558-5646.1996.tb02367.x>
- Xia, A., Zhong, L., Chen, X., Bian, W., Zhang, T., Shi, Y., 2015. Complete mitochondrial genome of spined sleeper *Eleotris oxycephala* (Perciformes, Eleotridae) and phylogenetic consideration. *Biochem. Syst. Ecol.* 62, 11–19. <https://doi.org/10.1016/j.bse.2015.07.030>
- Yamaguchi, M., Katayama, S., Omori, M., 2004. Migration pattern of shirauo *Salangichthys microdon* Bleeker, in the Ishikari River system and adjacent nearshore sea area, Japan, as estimated by otolith microchemistry analysis. *Fish. Sci.* 70, 546–552. <https://doi.org/10.1111/j.1444-2906.2004.00839.x>
- Yamanoue, Y., Miya, M., Doi, H., Mabuchi, K., Sakai, H., Nishida, M., 2011. Multiple invasions into freshwater by pufferfishes (Teleostei: Tetraodontidae): A mitogenomic perspective. *PLoS One* 6, e17410. <https://doi.org/10.1371/journal.pone.0017410>
- Yang, Z., Chen, Y.F., 2008. Differences in reproductive strategies between obscure puffer *Takifugu obscurus* and ocellated puffer *Takifugu ocellatus* during their spawning migration. *J. Appl. Ichthyol.* 24, 569–573. <https://doi.org/10.1111/j.1439-0426.2008.01071.x>
- Yatsuyanagi, T., Ishida, R., Sakata, M.K., Kanbe, T., Mizumoto, H., Kobayashi, Y., Kamada, S., Namba, S., Nii, H., Minamoto, T., Araki, H., 2020. Environmental DNA monitoring for short-term reproductive migration of endemic anadromous species, Shishamo smelt (*Spirinchus lanceolatus*). *Environ. DNA* 2, 130–139. <https://doi.org/10.1002/edn3.50>

- Zhang, J., Wei, F., Li, M., Xu, M., 2007. Threatened fishes of the world: *Hemihalargyreus prognathus* (Regan 1908) (Squalidae). *Environ. Biol. Fishes* 78, 209–210. <https://doi.org/10.1007/s10641-006-0011-7>
- Zhuang, P., Kynard, B., Zhang, L., Zhang, T., Cao, W., 2002. Ontogenetic behavior and migration of Chinese sturgeon, *Acipenser sinensis*. *Environ. Biol. Fishes* 65, 83–97. <https://doi.org/10.1023/A:1019621501672>
